# Supplementary material for: Sam68 promotes self-renewal and glycolytic metabolism in mouse neural progenitor cells by modulating Aldh1a3 pre-mRNA 3'-end processing
Source: eLife. 2016 Nov 15;5:e20750. doi: 10.7554/eLife.20750 (PMC5122457; doi:10.7554/eLife.20750)
Supplement: Figure 4—source data 1. — Yellow=upregulated genes; green=downregulated genes. NPCs, Neural progenitor cells. DOI: http://dx.doi.org/10.7554/eLife.20750.009 [file elife-20750-fig4-data1.xlsx]

## Sheet: Sheet1
Figure 4-source data 1: list of the genes up- and down-regulated inSam68 knockout NPCs; yellow=up-regulated genes; green=downregulated genes
Gene Symbol	Regulation	Fold-Change	P-Value	Gene Coordinates (mm9)	UCSC Link	Gene Name	Aliases and Synonyms	Representative Transcript ID	Entrez Gene ID	EnsEMBL ID
Islr	up	7.41	0.00266	chr9(-):58004115-58007028	UCSC	immunoglobulin superfamily containing leucine-rich repeat	---	NM_012043	26968	ENSMUSG00000037206
Fxyd1	up	6.65	0.00722	chr7(-):31836698-31840675	UCSC	FXYD domain-containing ion transport regulator 1	phospholemman // PLM // PML	NM_052992	56188	ENSMUSG00000036570
Serpina3n	up	6.34	0.00238	chr12(+):105644918-105652539	UCSC	serine (or cysteine) peptidase inhibitor, clade A, member 3N	alpha-1antiproteinase // antitrypsin // Spi2-2 // Spi2.2 // Spi2/eb.4	NM_009252	20716	ENSMUSG00000021091
Cybrd1	up	5.68	0.00204	chr2(+):70956109-70980983	UCSC	cytochrome b reductase 1	Dcytb	NM_028593	73649	ENSMUSG00000027015
Mag	up	5.67	0.00212	chr7(-):31684202-31699893	UCSC	myelin-associated glycoprotein	Gma // siglec-4a	NM_010758	17136	ENSMUSG00000036634
Mbp	up	5.31	0.00146	chr18(+):82644515-82755029	UCSC	myelin basic protein	golli-mbp // Hmbpr	NM_010777	17196	ENSMUSG00000041607
S100a1	up	5.28	0.00464	chr3(-):90314956-90318314	UCSC	S100 calcium binding protein A1	S100 // S100a	BC005590	20193	ENSMUSG00000044080
Clca1	up	4.86	0.0178	chr3(-):144392641-144423941	UCSC	chloride channel calcium activated 1	---	AF052746	12722	ENSMUSG00000056025
Tmem163	up	4.83	0.000624	chr1(-):129383131-129574598	UCSC	transmembrane protein 163	SV31	BC059048	72160	ENSMUSG00000026347
Enpp6	up	4.61	0.00342	chr8(+):48072274-48180249	UCSC	ectonucleotide pyrophosphatase/phosphodiesterase 6	D8Ertd514e // Npp6	AK046797	320981	ENSMUSG00000038173
Folh1	up	4.43	0.000504	chr7(-):93861086-93924376	UCSC	folate hydrolase 1	GCP2 // glutamatecarboxypeptidaseII // mopsm // prostate-specificmembraneantigen	AK090289	53320	ENSMUSG00000001773
Elovl7	up	4.33	0.00592	chr13(+):109004598-109077299	UCSC	ELOVL family member 7, elongation of long chain fatty acids (yeast)	---	NM_029001	74559	ENSMUSG00000021696
Cldn10	up	4.31	0.0115	chr14(+):119187093-119274689	UCSC	claudin 10	Cldn10a // Cldn10b // D14Ertd728e	NM_023878	58187	ENSMUSG00000022132
Cntnap2	up	4.22	0.00046	chr6(+):45010060-47251368	UCSC	contactin associated protein-like 2	Caspr2	NM_001004357	66797	ENSMUSG00000039419
S1pr3	up	4.2	0.0195	chr13(+):51503987-51518166	UCSC	sphingosine-1-phosphate receptor 3	Edg3 // LPb3 // S1P3	NM_010101	13610	ENSMUSG00000067586
Akr1c18	up	4.13	0.00452	chr13(-):4131862-4149895	UCSC	aldo-keto reductase family 1, member C18	20alpha-HSD // 20alpha-hydroxysteroiddehydrogenase	AK153898	105349	ENSMUSG00000021214
Nupr1	up	3.97	0.0341	chr7(-):133766760-133769005	UCSC	nuclear protein 1	Com1 // p8	AK009572	56312	ENSMUSG00000030717
Ifi204	up	3.91	0.0205	chr1(-):175677421-175697075	UCSC	interferon activated gene 204	p204	NM_008329	15951	ENSMUSG00000073489
9630013A20Rik	up	3.88	0.000624	chr14(-):84851283-84876233	UCSC	RIKEN cDNA 9630013A20 gene	---	AK051464	319903	null
Ddc	up	3.85	0.00226	chr11(-):11714104-11798147	UCSC	dopa decarboxylase	Aadc // aromaticL-aminoaciddecarboxylase	NM_001190448	13195	ENSMUSG00000020182
Gm98	up	3.81	0.00178	chr19(-):10282762-10315242	UCSC	predicted gene 98	LOC225908 // LOC386531	NM_001033481	225908	ENSMUSG00000036098
Grm7	up	3.8	0.0017	chr6(+):110314043-111517224	UCSC	glutamate receptor, metabotropic 7	Gpr1g // mGlu7areceptor // mGluR7	AK032068	108073	ENSMUSG00000056755
Gm13111	up	3.77	0.00386	chr4(+):154011684-154018825	UCSC	predicted gene 13111	---	AK083203	100042178	ENSMUSG00000085069
Cldn11	up	3.75	0.00132	chr3(+):31048842-31063248	UCSC	claudin 11	oligodendrocyte-specificprotein // Osp // Otm	NM_008770	18417	ENSMUSG00000037625
Hrsp12	up	3.63	0.016	chr15(-):34413776-34425001	UCSC	heat-responsive protein 12	HR12 // HRP12	NM_008287	15473	ENSMUSG00000022323
Rasgef1b	up	3.63	0.000665	chr5(-):99646439-99681946	UCSC	RasGEF domain family, member 1B	Gpig4	NM_181318	320292	ENSMUSG00000029333
Gsta1	up	3.6	0.0189	chr9(+):78078476-78090490	UCSC	glutathione S-transferase, alpha 1 (Ya)	Gst2-1	NM_008181	14857	ENSMUSG00000074183
Fbxo2	up	3.55	0.00806	chr4(+):147534733-147540524	UCSC	F-box protein 2	Fbs1 // FBX2 // NFB42 // Prpl4	AK140175	230904	ENSMUSG00000041556
Sox10	up	3.5	0.00542	chr15(-):78985339-78995670	UCSC	SRY-box containing gene 10	Sox21	AF017182	20665	ENSMUSG00000033006
Cml5 // Gm11128	up	3.5	0.01	chr6(-):85758047-85770968	UCSC	camello-like 5 // predicted gene 11128	---	BC014696	100504710 // 69049	ENSMUSG00000079494 // ENSMUSG00000079495
Ugt1a1 // Ugt1a6a // Ugt1a5 // Ugt1a7c // Ugt1a2 // Ugt1a9 // Ugt1a6b // Ugt1a10	up	3.45	0.00138	chr1(+):89951986-90116577	UCSC	UDP glucuronosyltransferase 1 family, polypeptide A1 // UDP glucuronosyltransferase 1 family, polypeptide A6A // UDP glucuronosyltransferase 1 family, polypeptide A5 // UDP glucuronosyltransferase 1 family, polypeptide A7C // UDP glucuronosyltransferase 1 family, polypeptide A2 // UDP glucuronosyltransferase 1 family, polypeptide A9 // UDP glucuronosyltransferase 1 family, polypeptide A6B // UDP …	A10' // A12 // A13 // A9' // Gnt1 // mUGTBr/P // Udpgt-1a // UGT1.6 // UGT1A01 // Ugt1a6 // UgtBr1	NM_201641	22236 // 394430 // 394432 // 394433 // 394434 // 394435 // 394436 // 94284	ENSMUSG00000054545 // ENSMUSG00000089943 // ENSMUSG00000089960 // ENSMUSG00000090124 // ENSMUSG00000090145 // ENSMUSG00000090165 // ENSMUSG00000090171 // ENSMUSG00000090175
Hspb1	up	3.44	0.00848	chr5(+):136363789-136365433	UCSC	heat shock protein 1	Hsp25	NM_013560	15507	ENSMUSG00000004951
Gfap	up	3.37	0.0203	chr11(-):102748651-102758514	UCSC	glial fibrillary acidic protein	---	NM_010277	14580	ENSMUSG00000020932
Gsta4	up	3.32	0.015	chr9(+):78039773-78057155	UCSC	glutathione S-transferase, alpha 4	GST5.7 // mGsta4	NM_010357	14860	ENSMUSG00000032348
Aldh1l1	up	3.32	0.003	chr6(+):90500812-90549164	UCSC	aldehyde dehydrogenase 1 family, member L1	Fthfd	BC028817	107747	ENSMUSG00000030088
9530059O14Rik	up	3.29	0.00328	chr9(+):122481615-122588714	UCSC	RIKEN cDNA 9530059O14 gene	---	AK049978	319626	ENSMUSG00000086476
9230118N01Rik	up	3.24	0.0348	chr2(-):151930419-151930945	UCSC	RIKEN cDNA 9230118N01 gene	---	AK020357	null	null
Fa2h	up	3.23	0.000265	chr8(-):113869038-113917721	UCSC	fatty acid 2-hydroxylase	Faxdc1	NM_178086	338521	ENSMUSG00000033579
Gabra4	up	3.17	0.000565	chr5(-):71960969-72049548	UCSC	gamma-aminobutyric acid (GABA) A receptor, subunit alpha 4	Gabra-4	NM_010251	14397	ENSMUSG00000029211
Tmem88b	up	3.17	0.00542	chr4(-):155155700-155159985	UCSC	transmembrane protein 88B	---	NM_001033394	320587	ENSMUSG00000073680
Nfasc	up	3.15	0.00168	chr1(-):134461268-134638377	UCSC	neurofascin	---	NM_182716	269116	ENSMUSG00000026442
1700084C01Rik	up	3.12	0.0115	chr1(+):171859069-171864784	UCSC	RIKEN cDNA 1700084C01 gene	---	AK141447	78465	ENSMUSG00000070532
Gbp6	up	3.12	0.00504	chr5(-):105699723-105722718	UCSC	guanylate binding protein 6	Mpa2l	NM_194336	100702	ENSMUSG00000079362
Elmod1	up	3.11	0.0301	chr9(-):53758026-53823109	UCSC	ELMO domain containing 1	---	AK132239	270162	ENSMUSG00000041986
Ddit4l	up	3.06	0.0184	chr3(+):137286633-137291297	UCSC	DNA-damage-inducible transcript 4-like	REDD2 // RTP801L	NM_030143	73284	ENSMUSG00000046818
Gabrb1	up	3.04	0.00128	chr5(+):72091189-72530155	UCSC	gamma-aminobutyric acid (GABA) A receptor, subunit beta 1	Gabrb-1	BC157920	14400	ENSMUSG00000029212
Penk	up	3.04	0.006	chr4(-):4060683-4065963	UCSC	preproenkephalin	ENK // Penk // Penk1 // PPA	AK135111	18619	ENSMUSG00000045573
C1ql1	up	3	0.0019	chr11(-):102800579-102807775	UCSC	complement component 1, q subcomponent-like 1	C1qrf	NM_011795	23829	ENSMUSG00000045532
Fhl2	up	2.98	0.00678	chr1(-):43179919-43253607	UCSC	four and a half LIM domains 2	SLIM3	AK052936	14200	ENSMUSG00000008136
Cdk18	up	2.97	0.000116	chr1(-):134010127-134036268	UCSC	cyclin-dependent kinase 18	Pctk3	NM_008795	18557	ENSMUSG00000026437
Ugt8a	up	2.94	0.0099	chr3(-):125568190-125659571	UCSC	UDP galactosyltransferase 8A	Cgt // mCerGT // Ugt8	BC016885	22239	ENSMUSG00000032854
1190002H23Rik	up	2.93	0.0258	chr14(-):79688558-79701442	UCSC	RIKEN cDNA 1190002H23 gene	RGC-32	NM_025427	66214	ENSMUSG00000022018
Tubb4a	up	2.85	0.000618	chr17(-):57219489-57227205	UCSC	tubulin, beta 4A class IVA	Tubb // Tubb4	NM_009451	22153	ENSMUSG00000062591
Tmem74	up	2.83	0.00576	chr15(-):43693169-43701583	UCSC	transmembrane protein 74	---	AK045145	239408	ENSMUSG00000054409
Plp1	up	2.81	0.0012	chrX(+):133357290-133372840	UCSC	proteolipid protein (myelin) 1	DM20 // Plp	AK134554	18823	ENSMUSG00000031425
Cyp4f14	up	2.79	0.0137	chr17(-):33042015-33054287	UCSC	cytochrome P450, family 4, subfamily f, polypeptide 14	leukotrieneB4omegahydroxylase	NM_001204336	64385	ENSMUSG00000024292
Col20a1	up	2.76	0.0253	chr2(+):180721240-180752245	UCSC	collagen, type XX, alpha 1	---	NM_028518	73368	ENSMUSG00000016356
Tuba4a	up	2.75	0.0492	chr1(-):75211547-75215830	UCSC	tubulin, alpha 4A	M[a]4 // Tuba4	AK078355	22145	ENSMUSG00000026202
Mgll	up	2.75	0.000921	chr6(+):88674406-88778354	UCSC	monoglyceride lipase	Magl	NM_011844	23945	ENSMUSG00000033174
Frmd5	up	2.74	0.0336	chr2(-):121371267-121632795	UCSC	FERM domain containing 5	---	NM_172673	228564	ENSMUSG00000027238
Zfhx4	up	2.73	0.000557	chr3(+):5218546-5415855	UCSC	zinc finger homeodomain 4	Zfh-4 // Zfh4	NM_030708	80892	ENSMUSG00000025255
Clca2	up	2.72	0.035	chr3(-):144459523-144482460	UCSC	chloride channel calcium activated 2	---	NM_030601	80797	ENSMUSG00000028262
Aqp4	up	2.7	0.0298	chr18(-):15547903-15569524	UCSC	aquaporin 4	aquaporin-4	AY803944	11829	ENSMUSG00000024411
Csn3	up	2.7	0.0442	chr5(+):88354631-88361573	UCSC	casein kappa	CSN10 // Csnk	AK164788	12994	ENSMUSG00000001622
Gm13298	up	2.67	0.00236	chr4(+):41836784-41842582	UCSC	predicted gene 13298	---	NM_001085530	545611	ENSMUSG00000078746
Flnc	up	2.67	0.018	chr6(+):29383153-29411888	UCSC	filamin C, gamma	actinbindingprotein280 // Fln2	NM_001081185	68794	ENSMUSG00000068699
Fam176a	up	2.65	0.00876	chr6(+):81991615-82043093	UCSC	family with sequence similarity 176, member A	Tmem166	NM_145570	232146	ENSMUSG00000035104
Pkp2	up	2.64	0.00456	chr16(+):16213406-16272805	UCSC	plakophilin 2	Pkp2l	AK004650	67451	ENSMUSG00000041957
Gnao1	up	2.64	0.00522	chr8(+):96334737-96493287	UCSC	guanine nucleotide binding protein, alpha O	alphaO // Galphao // Goalpha	NM_010308	14681	ENSMUSG00000031748
Ptgr1	up	2.61	0.0249	chr4(-):58978312-58999987	UCSC	prostaglandin reductase 1	Ltb4dh	AK134440	67103	ENSMUSG00000028378
Bcas1	up	2.6	0.0261	chr2(-):170172491-170253346	UCSC	breast carcinoma amplified sequence 1	NABC1	NM_029815	76960	ENSMUSG00000013523
Mobp	up	2.59	0.0138	chr9(+):120058859-120090602	UCSC	myelin-associated oligodendrocytic basic protein	MOBP155	AK083103	17433	ENSMUSG00000032517
Tmem90b	up	2.57	0.00212	chr2(+):149656519-149830128	UCSC	transmembrane protein 90B	SynDIG1	NM_001085521	433485	ENSMUSG00000074736
Gpr149	up	2.56	0.0016	chr3(-):62332999-62409064	UCSC	G protein-coupled receptor 149	PGR10	AK136826	229357	ENSMUSG00000043441
C4b	up	2.55	0.0101	chr17(-):34865325-34880842	UCSC	complement component 4B (Chido blood group)	C4 // Ss	NM_009780	12268	ENSMUSG00000073418
Parvb	up	2.54	0.0014	chr15(+):84062274-84146039	UCSC	parvin, beta	D15Gsk1	NM_133167	170736	ENSMUSG00000022438
Cnp	up	2.54	0.00414	chr11(+):100436229-100453043	UCSC	2',3'-cyclic nucleotide 3' phosphodiesterase	Cnp-1 // Cnp1 // CNPase	AK039251	12799	ENSMUSG00000006782
Efemp1	up	2.51	0.00592	chr11(+):28753203-28826743	UCSC	epidermal growth factor-containing fibulin-like extracellular matrix protein 1	---	NM_146015	216616	ENSMUSG00000020467
Ampd3	up	2.5	0.0136	chr7(+):117911720-117955917	UCSC	adenosine monophosphate deaminase 3	---	D85596	11717	ENSMUSG00000005686
Hebp1	up	2.5	0.0271	chr6(-):135087538-135118233	UCSC	heme binding protein 1	p22HBP	NM_013546	15199	ENSMUSG00000042770
Naaa	up	2.5	0.000917	chr5(-):92686686-92707209	UCSC	N-acylethanolamine acid amidase	Asahl	NM_025972	67111	ENSMUSG00000029413
Sema5a	up	2.49	0.00156	chr15(+):32174556-32626096	UCSC	sema domain, seven thrombospondin repeats (type 1 and type 1-like), transmembrane domain (TM) and short cytoplasmic domain, (semaphorin) 5A	M-SemaD // Semaf // semF	NM_009154	20356	ENSMUSG00000022231
Trappc2l	up	2.48	0.00156	chr8(+):125135526-125140562	UCSC	trafficking protein particle complex 2-like	---	BC114968	59005	ENSMUSG00000015013
Slc24a2	up	2.48	0.0164	chr4(-):86629033-87098956	UCSC	solute carrier family 24 (sodium/potassium/calcium exchanger), member 2	---	AK012771	76376	ENSMUSG00000037996
Slitrk6	up	2.47	0.0107	chr14(-):111147800-111154372	UCSC	SLIT and NTRK-like family, member 6	---	NM_175499	239250	ENSMUSG00000045871
Sema4d	up	2.47	0.000478	chr13(-):51796616-51889043	UCSC	sema domain, immunoglobulin domain (Ig), transmembrane domain (TM) and short cytoplasmic domain, (semaphorin) 4D	CD100 // coll-4 // M-semaG // Semacl2 // Semaj // semaphorinH // Semcl2	AK132688	20354	ENSMUSG00000021451
D930002L09Rik	up	2.46	0.000576	chr3(+):45203785-45205921	UCSC	RIKEN cDNA D930002L09 gene	---	AK052951	null	null
A930006A01Rik	up	2.46	0.0042	chr1(+):4775857-4776711	UCSC	RIKEN cDNA A930006A01 gene	---	AK020814	null	null
Man1a	up	2.45	0.00684	chr10(-):53624592-53795603	UCSC	mannosidase 1, alpha	2-mannosidase // mannosyl-oligosaccharidealpha-1 // PCR1	AK154820	17155	ENSMUSG00000003746
2810013P06Rik	up	2.45	0.0399	chr8(+):125566475-125568495	UCSC	RIKEN cDNA 2810013P06 gene	---	NR_045268	100503178	null
Ifitm3	up	2.45	0.00626	chr7(-):148195489-148196658	UCSC	interferon induced transmembrane protein 3	Fgls // fragilis // IP15 // mil-1	AY594690	66141	ENSMUSG00000025492
Adra2a	up	2.43	0.0316	chr19(+):54119748-54123470	UCSC	adrenergic receptor, alpha 2a	Adra-2 // Adra-2a // alpha(2A)AR // alpha2A // alpha2A-adrenergicreceptor // alpha2A-AR	AK140461	11551	ENSMUSG00000033717
Serpina3h	up	2.43	0.0195	chr12(+):105486106-105492615	UCSC	serine (or cysteine) peptidase inhibitor, clade A, member 3H	6C28 // alpha-1antiproteinase	NR_033450	546546	ENSMUSG00000041449
Plekhb1	up	2.43	0.012	chr7(-):107791406-107810908	UCSC	pleckstrin homology domain containing, family B (evectins) member 1	evt-1 // PHR1 // Phret1	NM_013746	27276	ENSMUSG00000030701
Vstm2a	up	2.42	0.0355	chr11(+):16157726-16327315	UCSC	V-set and transmembrane domain containing 2A	Vstm2	AK079096	211739	ENSMUSG00000048834
2900052N01Rik	up	2.42	0.0106	chr9(+):46721685-46735449	UCSC	RIKEN cDNA 2900052N01 gene	---	AK038437	73040	null
Cmtm5	up	2.41	0.0243	chr14(+):55555299-55558114	UCSC	CKLF-like MARVEL transmembrane domain containing 5	Cklfsf5	AK013666	67272	ENSMUSG00000040759
---	up	2.39	0.0306	chr12(-):75994813-75996558	UCSC	---	---	AK083633	---	---
Plxnb3	up	2.39	0.000421	chrX(+):71002393-71017853	UCSC	plexin B3	Plxn6	AK140240	140571	ENSMUSG00000031385
Plcg2	up	2.39	0.0234	chr8(+):120022178-120159040	UCSC	phospholipase C, gamma 2	Plcg-2 // PLCgamma2	AK170430	234779	ENSMUSG00000034330
Luzp2	up	2.39	0.0087	chr7(+):62090615-62524258	UCSC	leucine zipper protein 2	---	NM_178705	233271	ENSMUSG00000063297
3110035E14Rik	up	2.38	0.012	chr1(+):9591347-9617224	UCSC	RIKEN cDNA 3110035E14 gene	R75066	AK043759	76982	ENSMUSG00000067879
S100b	up	2.38	0.000863	chr10(+):75716581-75724063	UCSC	S100 protein, beta polypeptide, neural	---	NM_009115	20203	ENSMUSG00000033208
Scrg1	up	2.38	0.0304	chr8(+):59934720-59956383	UCSC	scrapie responsive gene 1	---	NM_009136	20284	ENSMUSG00000031610
Rlbp1	up	2.38	0.0071	chr7(-):86519755-86531914	UCSC	retinaldehyde binding protein 1	CRALBP	AK140622	19771	ENSMUSG00000039194
Eef1a2	up	2.37	0.05	chr2(-):180882398-180891720	UCSC	eukaryotic translation elongation factor 1 alpha 2	Eef1a // S1	NM_007906	13628	ENSMUSG00000016349
Prelp	up	2.37	0.00686	chr1(-):135806855-135817980	UCSC	proline arginine-rich end leucine-rich repeat	SLRR2A	AK037150	116847	ENSMUSG00000041577
Abhd3	up	2.37	0.00702	chr18(-):10644411-10706715	UCSC	abhydrolase domain containing 3	LABH3	AK144238	106861	ENSMUSG00000002475
Dock9	up	2.37	0.0061	chr14(-):121941261-122196956	UCSC	dedicator of cytokinesis 9	D14Wsu89e // Zizimin1	NM_134074	105445	ENSMUSG00000025558
Slc7a2	up	2.37	0.011	chr8(+):41947721-42007423	UCSC	solute carrier family 7 (cationic amino acid transporter, y+ system), member 2	Atrc2 // Cat2 // Tea	NM_007514	11988	ENSMUSG00000031596
F3	up	2.36	0.00838	chr3(+):121426455-121437970	UCSC	coagulation factor III	CD142 // Cf-3 // Cf3 // TF // tissuefactor	NM_010171	14066	ENSMUSG00000028128
Klkb1 // Cyp4v3	up	2.35	0.0106	chr8(-):46354811-46418550	UCSC	kallikrein B, plasma 1 // cytochrome P450, family 4, subfamily v, polypeptide 3	Kal-3 // Kal3 // Klk3 // PSA	M58588	102294 // 16621	ENSMUSG00000031640 // ENSMUSG00000079057
Fam134b	up	2.34	0.0495	chr15(+):25773019-25903442	UCSC	family with sequence similarity 134, member B	---	NM_001034851	66270	ENSMUSG00000022270
Pdgfra	up	2.34	0.00282	chr5(+):75548316-75594229	UCSC	platelet derived growth factor receptor, alpha polypeptide	CD140a // Pdgfr-2	NM_011058	18595	ENSMUSG00000029231
Dapp1	up	2.33	0.00288	chr3(-):137593970-137644513	UCSC	dual adaptor for phosphotyrosine and 3-phosphoinositides 1	Bam32	NM_011932	26377	ENSMUSG00000028159
Gpr37l1	up	2.33	0.00294	chr1(-):137056813-137064261	UCSC	G protein-coupled receptor 37-like 1	CAG-18 // D0Kist8	AK158275	171469	ENSMUSG00000026424
Slc13a3	up	2.32	0.00304	chr2(-):165230528-165298699	UCSC	solute carrier family 13 (sodium-dependent dicarboxylate transporter), member 3	NaDC-3 // NaDC3 // SDCT2	AK165355	114644	ENSMUSG00000018459
2900064B18Rik	up	2.31	0.00954	chr16(-):23985682-23986815	UCSC	RIKEN cDNA 2900064B18 gene	---	AK013747	null	null
Rab33a	up	2.31	0.0026	chrX(+):45872647-45883409	UCSC	RAB33A, member of RAS oncogene family	Rabs10	NM_011228	19337	ENSMUSG00000031104
P4ha3	up	2.31	0.0177	chr7(+):107434030-107468209	UCSC	procollagen-proline, 2-oxoglutarate 4-dioxygenase (proline 4-hydroxylase), alpha polypeptide III	---	NM_177161	320452	ENSMUSG00000051048
Efhd2	up	2.31	0.0435	chr4(-):141414057-141430867	UCSC	EF hand domain containing 2	D4Wsu27e // swiprosin1	AK048475	27984	ENSMUSG00000040659
Rap1gap	up	2.31	0.00492	chr4(+):137220641-137285776	UCSC	Rap1 GTPase-activating protein	Rap1ga1	NM_029563	110351	ENSMUSG00000041351
Defb14	up	2.3	0.00108	chr8(+):19194328-19195309	UCSC	defensin beta 14	mBD14	NM_183026	244332	ENSMUSG00000046354
Hspb8	up	2.29	0.0394	chr5(-):116858501-116872873	UCSC	heat shock protein 8	Cryac // D5Ucla4 // E2IG1 // H11 // H11K // HSP20-like // HSP22	NM_030704	80888	ENSMUSG00000041548
Tmem132b	up	2.29	0.00602	chr5(+):126012788-126272953	UCSC	transmembrane protein 132B	---	NM_001190352	208151	ENSMUSG00000070498
S100a6	up	2.28	0.0115	chr3(+):90416816-90418336	UCSC	S100 calcium binding protein A6 (calcyclin)	2A9 // 5B10 // Cacy // CALCYCLIN // PRA	NM_011313	20200	ENSMUSG00000001025
Glycam1	up	2.28	0.0339	chr15(-):103393193-103395511	UCSC	glycosylation dependent cell adhesion molecule 1	GlyCAM1 // Glycosylation-dependentcelladhesionmolecule1 // Seleligand // Sgp50	AK021358	14663	ENSMUSG00000022491
Gm3088	up	2.27	0.00484	chr2(-):29700222-29701771	UCSC	predicted gene 3088	---	BC129860	null	null
Gm5424	up	2.27	0.0228	chr10(+):61533770-61535319	UCSC	predicted gene 5424	---	NR_002687	432466	ENSMUSG00000046687
Ifi203	up	2.27	0.026	chr1(-):175850531-175872805	UCSC	interferon activated gene 203	---	AK144663	15950	ENSMUSG00000039997
Srxn1	up	2.25	0.045	chr2(+):151931260-151937102	UCSC	sulfiredoxin 1 homolog (S. cerevisiae)	Npn3 // Srx // Srx1	AK161066	76650	ENSMUSG00000032802
Id4	up	2.25	0.0267	chr13(+):48356597-48359405	UCSC	inhibitor of DNA binding 4	bHLHb27 // Id4 // Idb4	X75018	15904	ENSMUSG00000021379
Car5b	up	2.25	0.000682	chrX(-):160414756-160465942	UCSC	carbonic anhydrase 5b, mitochondrial	CAVB	NM_181315	56078	ENSMUSG00000031373
Papss2	up	2.24	0.000258	chr19(+):32670205-32741677	UCSC	3'-phosphoadenosine 5'-phosphosulfate synthase 2	Atpsk2 // Sk2	NM_001201470	23972	ENSMUSG00000024899
Pllp	up	2.24	0.00226	chr8(-):97198795-97220144	UCSC	plasma membrane proteolipid	plasmolipin // Tm4sf11	AK002477	67801	ENSMUSG00000031775
Opalin	up	2.23	0.0114	chr19(-):41136201-41151604	UCSC	oligodendrocytic myelin paranodal and inner loop protein	Tmem10 // Tmp10	AK140031	226115	ENSMUSG00000050121
Synpo	up	2.23	0.0226	chr18(-):60753627-60819798	UCSC	synaptopodin	---	AK033711	104027	ENSMUSG00000043079
Pyhin1	up	2.23	0.0268	chr1(+):175560990-175578059	UCSC	pyrin and HIN domain family, member 1	Ifi209 // Ifix	NM_175026	236312	ENSMUSG00000043263
Bfsp2	up	2.23	0.00302	chr9(-):103327254-103382658	UCSC	beaded filament structural protein 2, phakinin	CP49	NM_001002896	107993	ENSMUSG00000032556
Lhx2	up	2.22	0.00332	chr2(+):38194801-38225254	UCSC	LIM homeobox protein 2	ap // apterous // Lh-2 // LH2A	BC086638	16870	ENSMUSG00000000247
Lrrc8a // Phyhd1	up	2.22	0.0284	chr2(+):30093242-30137669	UCSC	leucine rich repeat containing 8A // phytanoyl-CoA dioxygenase domain containing 1	Lrrc8	BC048152	227696 // 241296	ENSMUSG00000007476 // ENSMUSG00000079484
Slc22a4	up	2.22	0.0434	chr11(-):53796628-53841606	UCSC	solute carrier family 22 (organic cation transporter), member 4	Octn1	AK143595	30805	ENSMUSG00000020334
Nfe2l3	up	2.22	0.00672	chr6(+):51382669-51408770	UCSC	nuclear factor, erythroid derived 2, like 3	Nrf3	NM_010903	18025	ENSMUSG00000029832
Sqrdl	up	2.21	0.00788	chr2(+):122591093-122635285	UCSC	sulfide quinone reductase-like (yeast)	flavo-bindingprotein	NM_001162503	59010	ENSMUSG00000005803
Gpr17	up	2.2	0.0106	chr18(-):32102654-32109290	UCSC	G protein-coupled receptor 17	---	NM_001025381	574402	ENSMUSG00000052229
Adssl1	up	2.2	0.0184	chr12(+):113858255-113879568	UCSC	adenylosuccinate synthetase like 1	Adss	NM_007421	11565	ENSMUSG00000011148
Padi2	up	2.2	0.0014	chr4(+):140462275-140508501	UCSC	peptidyl arginine deiminase, type II	PADtypeII // Pdi // Pdi2	NM_008812	18600	ENSMUSG00000028927
Cpeb1	up	2.18	0.0113	chr7(-):88491913-88599648	UCSC	cytoplasmic polyadenylation element binding protein 1	---	NM_007755	12877	ENSMUSG00000025586
Ifit3	up	2.17	0.0424	chr19(+):34658017-34663526	UCSC	interferon-induced protein with tetratricopeptide repeats 3	Ifi49	AK153226	15959	ENSMUSG00000074896
5430435G22Rik	up	2.17	0.0044	chr1(+):133585272-133610039	UCSC	RIKEN cDNA 5430435G22 gene	Rab7b	NM_145509	226421	ENSMUSG00000052688
Prickle1	up	2.15	0.00182	chr15(-):93329545-93426324	UCSC	prickle homolog 1 (Drosophila)	mpk1	AK153711	106042	ENSMUSG00000036158
Ppap2c	up	2.15	0.0434	chr10(-):78989174-78996532	UCSC	phosphatidic acid phosphatase type 2C	Lpp2	NM_015817	50784	ENSMUSG00000052151
Anxa2	up	2.15	0.0404	chr9(+):69301488-69339600	UCSC	annexin A2	36-kDacalelectrin // annexinII // Cal1h // lipocortinII	AK012563	12306	ENSMUSG00000032231
Cdh8	up	2.15	0.000958	chr8(-):101548371-101940357	UCSC	cadherin 8	cad8	AK044046	12564	ENSMUSG00000036510
Aldh1a3	up	2.15	0.0122	chr7(-):73535781-73572365	UCSC	aldehyde dehydrogenase family 1, subfamily A3	ALDH6 // RALDH3 // retinaldehydedehydrogenase3 // V1	AK147006	56847	ENSMUSG00000015134
Meig1	up	2.14	0.0207	chr2(-):3326315-3339920	UCSC	meiosis expressed gene 1	Meg1	NM_008579	104362	ENSMUSG00000026650
Gal3st1	up	2.14	0.00252	chr11(+):3883639-3899331	UCSC	galactose-3-O-sulfotransferase 1	3'-phosphoadenylylsulfate-galactosylceramide3'-sulfotransferase // galactosylceramidesulfotransferase // GalCersulfotransferase // Gcst	NM_016922	53897	ENSMUSG00000049721
Tmeff2	up	2.13	0.0351	chr1(+):50957489-51244114	UCSC	transmembrane protein with EGF-like and two follistatin-like domains 2	---	NM_019790	56363	ENSMUSG00000026109
Pla2g4a	up	2.12	0.0227	chr1(-):151676752-151808414	UCSC	phospholipase A2, group IVA (cytosolic, calcium-dependent)	cPLA2 // cPLA2alpha // cytosolicphospholipaseA2 // cytosolicPLA2 // Pla2g4 // TypeIVPLA2	NM_008869	18783	ENSMUSG00000056220
Psd2	up	2.12	0.00788	chr18(+):36124484-36174367	UCSC	pleckstrin and Sec7 domain containing 2	EFA6C	BC066026	74002	ENSMUSG00000024347
Inf2	up	2.11	0.007	chr12(+):113826995-113853767	UCSC	inverted formin, FH2 and WH2 domain containing	EG629699	NM_198411	70435	ENSMUSG00000037679
Gm2115	up	2.11	0.0225	chr7(+):91677464-91726849	UCSC	predicted gene 2115	C77713	NR_045098	100039239	ENSMUSG00000085128
Grid2	up	2.11	0.0031	chr6(+):63205869-64618276	UCSC	glutamate receptor, ionotropic, delta 2	GluRdelta2 // tpr	NM_008167	14804	ENSMUSG00000071424
4933421O10Rik	up	2.11	0.00666	chr4(-):33114114-33118298	UCSC	RIKEN cDNA 4933421O10 gene	---	NR_036602	100504166	ENSMUSG00000085037
Galnt13	up	2.1	0.0015	chr2(+):54288797-54970155	UCSC	UDP-N-acetyl-alpha-D-galactosamine:polypeptide N-acetylgalactosaminyltransferase 13	pp-GalNAc-T13	NM_173030	271786	ENSMUSG00000060988
Fgd4	up	2.1	0.0248	chr16(-):16417010-16600645	UCSC	FYVE, RhoGEF and PH domain containing 4	Frabin // Frabin-alpha // Frabin-beta // Frabin-gamma // ZFYVE6	BC129903	224014	ENSMUSG00000022788
Bhlhe41	up	2.1	0.0357	chr6(-):145811257-145813900	UCSC	basic helix-loop-helix family, member e41	Bhlhb3 // DEC2 // Sharp1	NM_024469	79362	ENSMUSG00000030256
S100a16	up	2.09	0.0186	chr3(+):90341294-90347071	UCSC	S100 calcium binding protein A16	---	AK160178	67860	ENSMUSG00000074457
C530020B09Rik	up	2.08	0.000963	chr3(+):113332769-113334201	UCSC	RIKEN cDNA C530020B09 gene	---	AK049667	null	null
Sorbs3	up	2.08	0.00704	chr14(-):70580275-70611797	UCSC	sorbin and SH3 domain containing 3	Sh3d4 // SH3P3 // vinexinalpha // vinexinbeta	AK029703	20410	ENSMUSG00000022091
Gbe1	up	2.07	0.0361	chr16(+):70314307-70569961	UCSC	glucan (1,4-alpha-), branching enzyme 1	D16Ertd536e	AK050365	74185	ENSMUSG00000022707
Il1rap	up	2.07	0.00244	chr16(+):26581791-26725350	UCSC	interleukin 1 receptor accessory protein	IL-1RAcP	AK083209	16180	ENSMUSG00000022514
Sdk2	up	2.07	0.0465	chr11(-):113639901-113928361	UCSC	sidekick homolog 2 (chicken)	---	NM_172800	237979	ENSMUSG00000041592
Slc6a15	up	2.07	0.00074	chr10(+):102830442-102882012	UCSC	solute carrier family 6 (neurotransmitter transporter), member 15	v7-3	NM_175328	103098	ENSMUSG00000019894
Tmem202	up	2.07	0.0486	chr9(-):59366462-59387658	UCSC	transmembrane protein 202	---	AK008510	73893	ENSMUSG00000049526
Ptger1	up	2.07	0.00452	chr8(+):86190539-86196654	UCSC	prostaglandin E receptor 1 (subtype EP1)	42kDa // EP1 // Ptgerep1	AK053616	19216	ENSMUSG00000019464
Cadm3	up	2.07	0.00312	chr1(-):175264385-175297826	UCSC	cell adhesion molecule 3	BIgR // Igsf4b // Necl-1 // Necl1 // SynCAM3 // Tsll1	NM_053199	94332	ENSMUSG00000005338
Opcml	up	2.06	0.0202	chr9(+):27598532-28732631	UCSC	opioid binding protein/cell adhesion molecule-like	LOC235104 // Obcam	NM_177906	330908	ENSMUSG00000062257
Cnksr3	up	2.06	0.0037	chr10(+):3134303-3227480	UCSC	Cnksr family member 3	Magi1	AK033015	215748	ENSMUSG00000015202
Taldo1	up	2.05	0.0141	chr7(+):148578059-148588875	UCSC	transaldolase 1	---	NM_011528	21351	ENSMUSG00000025503
Sirt2	up	2.05	0.000281	chr7(+):29551771-29573684	UCSC	sirtuin 2 (silent mating type information regulation 2, homolog) 2 (S. cerevisiae)	Sir2l // SIR2L2	NM_022432	64383	ENSMUSG00000015149
Slc4a10	up	2.04	0.0199	chr2(+):61884572-62164799	UCSC	solute carrier family 4, sodium bicarbonate cotransporter-like, member 10	NCBE	NM_033552	94229	ENSMUSG00000026904
Rln1	up	2.04	0.0228	chr19(-):29406188-29409160	UCSC	relaxin 1	rlx	NM_011272	19773	ENSMUSG00000039097
Mro	up	2.04	0.0459	chr18(+):74019041-74040987	UCSC	maestro	---	AK015725	71263	ENSMUSG00000064036
Il13ra1	up	2.04	0.0462	chrX(+):33652101-33711257	UCSC	interleukin 13 receptor, alpha 1	CD213a1	AK154675	16164	ENSMUSG00000017057
AW551984	up	2.04	0.00132	chr9(-):39395014-39411854	UCSC	expressed sequence AW551984	---	AK049098	244810	ENSMUSG00000038112
D030046N08Rik	up	2.03	0.0491	chr18(-):84888394-84890169	UCSC	RIKEN cDNA D030046N08 gene	EG433208 // Gm15955	AK141732	433208	ENSMUSG00000089760
Gng4	up	2.03	0.0446	chr13(+):13876594-13920164	UCSC	guanine nucleotide binding protein (G protein), gamma 4	4	AK148452	14706	ENSMUSG00000021303
Dkk3	up	2.03	0.0244	chr7(-):119259531-119302571	UCSC	dickkopf homolog 3 (Xenopus laevis)	---	NM_015814	50781	ENSMUSG00000030772
AA467197	up	2.02	0.0334	chr2(+):122463623-122466820	UCSC	expressed sequence AA467197	NMES1	NM_001004174	433470	ENSMUSG00000033213
Fam177a	up	2.01	0.00196	chr12(+):56225455-56243067	UCSC	family with sequence similarity 177, member A	---	NM_028527	73385	ENSMUSG00000073083
Lpar1	up	2.01	0.00104	chr4(-):58448124-58566397	UCSC	lysophosphatidic acid receptor 1	Edg2 // Gpcr26 // Kdt2 // LPA1 // vzg-1	NM_010336	14745	ENSMUSG00000038668
Abca1	up	2.01	0.0378	chr4(-):53043660-53172768	UCSC	ATP-binding cassette, sub-family A (ABC1), member 1	ABC1	NM_013454	11303	ENSMUSG00000015243
Txnip	up	2	0.00364	chr3(+):96361880-96365780	UCSC	thioredoxin interacting protein	Hyplip1 // mVDUP1 // THIF // VDUP1	NM_023719	56338	ENSMUSG00000038393
Sp8	up	2	0.0108	chr12(+):120084802-120091051	UCSC	trans-acting transcription factor 8	mBtd	NM_177082	320145	ENSMUSG00000048562
2610305J24Rik	down	21.93	2.45e-05	chr12(-):41998038-42000133	UCSC	RIKEN cDNA 2610305J24 gene	---	AK011989	null	null
Acta2	down	6.69	0.012	chr19(-):34315580-34329826	UCSC	actin, alpha 2, smooth muscle, aorta	a-SMA // Actvs // alphaSMA // SMalphaA	AK156331	11475	ENSMUSG00000035783
Ucp2	down	6.13	0.00314	chr7(+):107641854-107650682	UCSC	uncoupling protein 2 (mitochondrial, proton carrier)	---	NM_011671	22228	ENSMUSG00000033685
Khdrbs1	down	4.84	1.17e-06	chr4(-):129380413-129419548	UCSC	KH domain containing, RNA binding, signal transduction associated 1	p62 // Sam68	NR_045036	20218	ENSMUSG00000028790
Six3os1	down	4.42	0.0172	chr17(-):86001273-86018751	UCSC	Six3 opposite strand transcript 1	D17Mgi26 // Rncr1	NR_038085	100043902	ENSMUSG00000093460
Otx2	down	4.41	0.016	chr14(-):49277354-49287181	UCSC	orthodenticle homolog 2 (Drosophila)	---	BC029667	18424	ENSMUSG00000021848
Mir1190	down	4.23	0.0288	chr12(-):102259883-102260003	UCSC	microRNA 1190	Mirn1190 // mmu-mir-1190	NR_035421	null	ENSMUSG00000080575
Rab3b	down	4.17	0.00596	chr4(+):108551675-108615929	UCSC	RAB3B, member RAS oncogene family	---	NM_023537	69908	ENSMUSG00000003411
Palmd	down	4.15	0.000584	chr3(-):116621176-116671870	UCSC	palmdelphin	PALML	NM_023245	114301	ENSMUSG00000033377
Olfr1312	down	3.77	0.00306	chr2(-):111882234-111883187	UCSC	olfactory receptor 1312	GA_x6K02T2Q125-73090482-73089529 // MOR245-20	NM_146362	258359	ENSMUSG00000074947
Six3	down	3.4	0.0401	chr17(+):86012948-86030131	UCSC	sine oculis-related homeobox 3 homolog (Drosophila)	---	X90871	20473	ENSMUSG00000093450
9530018D06Rik	down	3.32	0.0221	chr11(+):44539427-44540886	UCSC	RIKEN cDNA 9530018D06 gene	---	AK035329	null	null
4930546G22Rik	down	3.29	0.0175	chr4(+):127938288-127940234	UCSC	RIKEN cDNA 4930546G22 gene	---	AK016051	null	ENSMUSG00000085717
C030045M22Rik	down	2.96	0.00748	chr12(+):39228031-39229157	UCSC	RIKEN cDNA C030045M22 gene	---	AK021151	null	null
Olfr1314	down	2.9	0.000978	chr2(-):111931605-111932975	UCSC	olfactory receptor 1314	GA_x6K02T2Q125-73139026-73138088 // MOR245-2	BC141576	258442	ENSMUSG00000074945
4833411I10Rik	down	2.88	0.00824	chr2(-):148253958-148256753	UCSC	RIKEN cDNA 4833411I10 gene	---	AK138958	null	null
Angpt2	down	2.72	0.0308	chr8(-):18690263-18741551	UCSC	angiopoietin 2	Ang-2 // Ang2	AK143974	11601	ENSMUSG00000031465
Cd93	down	2.71	0.0266	chr2(-):148262387-148269762	UCSC	CD93 antigen	AA4.1 // C1qr1 // C1qrp // Ly68	AF081789	17064	ENSMUSG00000027435
6330407A03Rik	down	2.64	0.00336	chr4(+):3642111-3643960	UCSC	RIKEN cDNA 6330407A03 gene	---	NR_028126	70720	null
C130075A20Rik	down	2.64	0.0394	chr3(+):52902947-52907097	UCSC	RIKEN cDNA C130075A20 gene	---	AK085840	null	null
Cpne8	down	2.61	0.000602	chr15(-):90317912-90509822	UCSC	copine VIII	---	NM_025815	66871	ENSMUSG00000052560
5830490A04Rik	down	2.59	0.0147	chr10(-):63506328-63507658	UCSC	RIKEN cDNA 5830490A04 gene	---	AK018065	null	null
E130104P22Rik	down	2.52	0.012	chr13(-):28621674-28625272	UCSC	RIKEN cDNA E130104P22 gene	---	AK053520	null	null
Zfp386	down	2.49	0.00268	chr12(+):117294663-117296890	UCSC	zinc finger protein 386 (Kruppel-like)	---	AK050088	56220	ENSMUSG00000042063
Rasal2	down	2.48	0.0161	chr1(-):159277470-159280174	UCSC	RAS protein activator like 2	---	AK040299	226525	ENSMUSG00000070565
1700003M07Rik	down	2.48	0.00128	chr4(+):129637617-129642381	UCSC	RIKEN cDNA 1700003M07 gene	---	NR_040647	null	ENSMUSG00000085389
B130020M22Rik	down	2.41	0.0255	chr10(+):118933939-118939851	UCSC	RIKEN cDNA B130020M22 gene	---	AK048505	null	null
Gm4262	down	2.37	0.0173	chr16(+):11008989-11015279	UCSC	predicted gene 4262	---	AK050866	100043147	ENSMUSG00000086305
Gm19335	down	2.34	0.0329	chr1(-):68638192-68640261	UCSC	predicted gene, 19335	---	AK051247	100502712	null
Olfr1313	down	2.33	0.0226	chr2(-):111911803-111912744	UCSC	olfactory receptor 1313	GA_x6K02T2Q125-73119859-73118924 // MOR245-23	BC127964	258257	ENSMUSG00000074946
5930430O07Rik	down	2.33	0.0445	chr13(-):28952574-28955715	UCSC	RIKEN cDNA 5930430O07 gene	---	AK031220	null	null
C030006N10Rik	down	2.3	0.01	chr10(-):31998981-31999501	UCSC	RIKEN cDNA C030006N10 gene	---	AK021051	null	null
B430203G13Rik	down	2.29	0.000643	chr12(+):17931100-17932474	UCSC	RIKEN cDNA B430203G13 gene	---	AK046603	null	ENSMUSG00000067356
Adam19	down	2.29	0.00938	chr11(+):45868003-45972065	UCSC	a disintegrin and metallopeptidase domain 19 (meltrin beta)	Mltnb	BC148371	11492	ENSMUSG00000011256
Dgkk	down	2.26	0.042	chrX(+):6356432-6525488	UCSC	diacylglycerol kinase kappa	---	NM_177914	331374	ENSMUSG00000062393
En2	down	2.24	0.0365	chr5(+):28492233-28498713	UCSC	engrailed 2	En-2	AK157766	13799	ENSMUSG00000039095
Mym	down	2.23	0.0127	chr5(+):28495016-28495380	UCSC	myocyte maintenance	---	AF019615	null	null
Gm4983	down	2.22	0.00736	chr12(+):17999668-18072413	UCSC	predicted gene 4983	---	BC030401	245297	ENSMUSG00000091687
Pcp4l1	down	2.22	0.0139	chr1(-):173103394-173127166	UCSC	Purkinje cell protein 4-like 1	---	NM_025557	66425	ENSMUSG00000038370
Rasal2	down	2.2	0.0368	chr1(-):159284605-159285781	UCSC	RAS protein activator like 2	---	AK087054	226525	ENSMUSG00000070565
Dgkg	down	2.18	0.0224	chr16(-):22466644-22657304	UCSC	diacylglycerol kinase, gamma	Dagk3	NM_138650	110197	ENSMUSG00000022861
Egfr	down	2.18	0.0201	chr11(+):16815771-16818159	UCSC	epidermal growth factor receptor	avianerythroblasticleukemiaviral(v-erb-b)oncogenehomolog // Erbb // Errb1 // Wa5	AK033431	13649	ENSMUSG00000020122
2610304O13Rik	down	2.16	3.89e-05	chr13(-):28817779-28818217	UCSC	RIKEN cDNA 2610304O13 gene	---	AK011983	null	null
9330188P03Rik	down	2.15	0.00928	chr14(+):105988693-106003119	UCSC	RIKEN cDNA 9330188P03 gene	LOC380930	AK145081	380930	ENSMUSG00000087212
Lpo	down	2.15	0.0482	chr11(-):87619930-87639617	UCSC	lactoperoxidase	---	BC016212	76113	ENSMUSG00000009356
2310075K07Rik	down	2.15	0.0153	chr10(-):44786218-44786886	UCSC	RIKEN cDNA 2310075K07 gene	---	AK010182	null	null
2810047C21Rik1	down	2.15	0.0268	chr7(+):10034292-10041283	UCSC	RIKEN cDNA 2810047C21 gene 1	Gm4082	AK083498	72716	null
Ncapg2	down	2.12	0.0477	chr12(+):117643875-117702005	UCSC	non-SMC condensin II complex, subunit G2	Luzp5 // mCAP-G2 // Mtb	NM_133762	76044	ENSMUSG00000042029
9530019H20Rik	down	2.12	0.0434	chr8(-):71059934-71064162	UCSC	RIKEN cDNA 9530019H20 gene	---	AK032243	null	null
D930030O05Rik	down	2.11	0.0199	chr7(+):75251581-75258241	UCSC	RIKEN cDNA D930030O05 gene	---	AK083489	null	null
1700125C05Rik	down	2.1	0.0437	chr13(-):113590587-113590937	UCSC	RIKEN cDNA 1700125C05 gene	---	AK007275	null	null
Camk2b	down	2.05	0.0223	chr11(-):5869671-5965753	UCSC	calcium/calmodulin-dependent protein kinase II, beta	CaMKII	NM_007595	12323	ENSMUSG00000057897
9130219B18Rik	down	2.04	0.00142	chr13(+):110374188-110374641	UCSC	RIKEN cDNA 9130219B18 gene	---	AK020283	null	null
Zc3hav1	down	2.04	0.0198	chr6(-):38255323-38257158	UCSC	zinc finger CCCH type, antiviral 1	ZAP	AK036481	78781	ENSMUSG00000029826
A930036I15Rik	down	2.02	0.000919	chr3(-):126669393-126670437	UCSC	RIKEN cDNA A930036I15 gene	---	AK020934	null	null
9430081I23Rik	down	2.02	0.0223	chr13(-):28861476-28864049	UCSC	RIKEN cDNA 9430081I23 gene	---	AK041778	null	null
D130019J16Rik	down	2.01	0.0465	chr1(+):139831766-139833923	UCSC	RIKEN cDNA D130019J16 gene	---	AK051229	null	null
Skap2	down	2.01	0.0137	chr6(-):51809165-51962548	UCSC	src family associated phosphoprotein 2	mSKAP55R // RA70 // Saps // SKAP-HOM	NM_018773	54353	ENSMUSG00000059182
D730035F11Rik	down	2	0.0166	chr9(-):116070417-116076565	UCSC	RIKEN cDNA D730035F11 gene	---	AK037550	null	null
