# Supplementary material for: Sam68 promotes self-renewal and glycolytic metabolism in mouse neural progenitor cells by modulating Aldh1a3 pre-mRNA 3'-end processing
Source: eLife. 2016 Nov 15;5:e20750. doi: 10.7554/eLife.20750 (PMC5122457; doi:10.7554/eLife.20750)
Supplement: Figure 4—source data 2. — Green: genes downregulated at expression level; Yellow: genes up-regulated at expression level; White: genes unchanged at expression level. NPCs, Neural progenitor cells. DOI: http://dx.doi.org/10.7554/eLife.20750.010 [file elife-20750-fig4-data2.xlsx]

## Sheet: Sheet1
Figure 4-source data 2: list of exons regulated by SAM68 in mouse NPCs
Green: genes downregulated at expression level; Yellow: genes up-regulated at expression level; White: genes unchanged at expression level.
Gene Symbol	Detected Exon	Known Alternative Event	Regulation Splicing Index	Fold-Change Splicing Index	P-Value Splicing Index	Gene Coordinates (mm9)	Gene Name	Representative Transcript ID	Entrez Gene ID	EnsEMBL ID	EnsEMBL ID	Regulation Gene	Fold-Change Gene	P-value Gene
Khdrbs1	e4	unknown	down	20.29	7.3894e-07	chr4(-):129402820-129402966	KH domain containing, RNA binding, signal transduction associated 1	NR_045036	20218	ENSMUSG00000028790	ENSMUSG00000023951	up	1.92	0.0141
Itgb1	e2	unknown	down	9.5	0.00083769	chr8(+):131229313-131229379	integrin beta 1 (fibronectin receptor beta)	NM_010578	16412	ENSMUSG00000025809	ENSMUSG00000056602	up	1.95	0.104
Gm11974	e2	alternative_first_exon,exon_skipping	down	8.95	0.0012954	chr11(-):6426972-6427058	predicted gene 11974	AK032971	100041286	ENSMUSG00000085156	ENSMUSG00000019732	up	1.54	0.0555
Tmem234	e4	exon_skipping	down	6.52	0.0002355	chr4(+):129279114-129279205	transmembrane protein 234	AK045767	76799	ENSMUSG00000028797	ENSMUSG00000004633	up	1.63	0.017
Tmem163	e9	alternative_last_exon	down	5.23	0.00101754	chr1(-):129383131-129383274	transmembrane protein 163	BC059048	72160	ENSMUSG00000026347	ENSMUSG00000004633	up	1.63	0.017
Cntnap2	e13	unknown	down	4.07	9.6889e-05	chr6(+):46938639-46938809	contactin associated protein-like 2	NM_001004357	66797	ENSMUSG00000039419	ENSMUSG00000004633	up	1.63	0.017
Klhdc4	e9	unknown	down	3.97	0.000138498	chr8(-):124323348-124323556	kelch domain containing 4	NM_145605	234825	ENSMUSG00000040263	ENSMUSG00000040111	up	1.48	0.0472
Klhdc4	e11	unknown	down	3.86	0.036479	chr8(-):124320818-124320928	kelch domain containing 4	NM_145605	234825	ENSMUSG00000040263	ENSMUSG00000036282	up	1.24	0.0199
Mag	e2	exon_skipping	down	3.29	0.0057428	chr7(-):31699288-31699340	myelin-associated glycoprotein	NM_010758	17136	ENSMUSG00000036634	ENSMUSG00000074457	up	2.3	0.0116
Aldh1a3	e13	unknown	down	3.23	0.00194371	chr7(-):73544964-73545121	aldehyde dehydrogenase family 1, subfamily A3	AK147006	56847	ENSMUSG00000015134	ENSMUSG00000026904	up	2.04	0.0199
Sphk1	ae3	alternative_first_exon,exon_skipping	down	3.12	0.020985	---	sphingosine kinase 1	NM_001172475	20698	ENSMUSG00000061878	ENSMUSG00000043323	up	1.8	0.0656
Six3os1	e3	alternative_last_exon	down	3.07	0.048922	chr17(-):86014934-86015083	Six3 opposite strand transcript 1	NR_038085	100043902	ENSMUSG00000093460	ENSMUSG00000055737	up	1.84	0.0447
Cpne7	e2	unknown	down	2.96	0.00127574	chr8(+):125643519-125643701	copine VII	NM_170684	102278	ENSMUSG00000034796	ENSMUSG00000039007	up	1.46	0.0054
Aldh1a3	e10	unknown	down	2.93	0.00048379	chr7(-):73552687-73552789	aldehyde dehydrogenase family 1, subfamily A3	AK147006	56847	ENSMUSG00000015134	ENSMUSG00000061878	up	1.87	0.0637
Aldh1a3	e15	alternative_last_exon	down	2.92	0.00068068	chr7(-):73535781-73537647	aldehyde dehydrogenase family 1, subfamily A3	AK147006	56847	ENSMUSG00000015134	ENSMUSG00000061878	up	1.87	0.0637
Aldh1a3	e12	unknown	down	2.91	0.0034433	chr7(-):73546857-73547021	aldehyde dehydrogenase family 1, subfamily A3	AK147006	56847	ENSMUSG00000015134	ENSMUSG00000036019	down	1	0.992
Nfe2l3	e2	alternative_last_exon,exon_skipping	down	2.83	0.0050637	chr6(+):51386698-51386907	nuclear factor, erythroid derived 2, like 3	NM_010903	18025	ENSMUSG00000029832	ENSMUSG00000078894	up	1.89	0.0342
Aldh1a3	e3	alternative_first_exon,exon_skipping	down	2.75	0.00090489	chr7(-):73570412-73570589	aldehyde dehydrogenase family 1, subfamily A3	AK147006	56847	ENSMUSG00000015134	ENSMUSG00000078894	up	1.89	0.0342
Fanca	e3	unknown	down	2.75	0.0162215	chr8(-):125840263-125840356	Fanconi anemia, complementation group A	NM_016925	14087	ENSMUSG00000032815	ENSMUSG00000031982	up	1.34	0.0129
Arv1	ae5	alternative_last_exon	down	2.71	0.00178456	---	ARV1 homolog (yeast)	AK004398	68865	ENSMUSG00000031982	ENSMUSG00000029821	up	1.44	0.0223
Sec23ip	e10	unknown	down	2.7	1.4845e-06	chr7(+):135908898-135909016	Sec23 interacting protein	NM_001029982	207352	ENSMUSG00000055319	ENSMUSG00000027679	up	1.13	0.165
Ngdn	e10	unknown	down	2.7	0.0115587	chr14(+):55642173-55642230	neuroguidin, EIF4E binding protein	NM_026890	68966	ENSMUSG00000022204	null	down	1.03	0.838
Asap2	e2	unknown	down	2.68	0.0036237	chr12(+):21048796-21049194	ArfGAP with SH3 domain, ankyrin repeat and PH domain 2	AK018309	211914	ENSMUSG00000052632	ENSMUSG00000073856	up	1.31	0.0379
Aldh1a3	e11	unknown	down	2.67	0.0020618	chr7(-):73550860-73551044	aldehyde dehydrogenase family 1, subfamily A3	AK147006	56847	ENSMUSG00000015134	ENSMUSG00000038473	up	1.25	0.116
Tapt1	e7	unknown	down	2.66	0.000119445	chr5(-):44583320-44583389	transmembrane anterior posterior transformation 1	NM_173764	231225	ENSMUSG00000046985	ENSMUSG00000030867 // ENSMUSG00000030868	up	1.3	0.0208
Aldh1a3	e14	unknown	down	2.6	0.0081042	chr7(-):73543574-73543648	aldehyde dehydrogenase family 1, subfamily A3	AK147006	56847	ENSMUSG00000015134	ENSMUSG00000021713	down	1.42	0.0295
S100a16	ae1	alternative_first_exon	down	2.6	0.003195	---	S100 calcium binding protein A16	AK160178	67860	ENSMUSG00000074457	ENSMUSG00000043535	down	1.1	0.242
Sphk1	ae4	alternative_first_exon,exon_skipping	down	2.57	0.0061611	---	sphingosine kinase 1	NM_001172475	20698	ENSMUSG00000061878	ENSMUSG00000093460	down	4.42	0.0172
Calr3	ae5	alternative_first_exon	down	2.55	0.046559	---	calreticulin 3	NM_028500	73316	ENSMUSG00000019732	ENSMUSG00000026347	up	4.83	0.000624
Vegfa	ae9	alternative_acceptor_splice_site	down	2.47	0.021898	---	vascular endothelial growth factor A	NM_009505	22339	ENSMUSG00000023951	ENSMUSG00000021391	down	1.23	0.17
Macrod2	e6	alternative_last_exon,exon_skipping	down	2.45	0.0120044	chr2(+):140335615-140335871	MACRO domain containing 2	NM_001013802	72899	ENSMUSG00000068205	ENSMUSG00000004633	up	1.63	0.017
Dfna5	e13	alternative_last_exon	down	2.42	0.0060598	chr6(-):50139368-50140981	deafness, autosomal dominant 5 (human)	AK089459	54722	ENSMUSG00000029821	ENSMUSG00000045095	up	1.07	0.354
Hivep2	e5	alternative_last_exon,exon_skipping	down	2.39	0.0023426	chr10(+):13796817-13799481	human immunodeficiency virus type I enhancer binding protein 2	NM_010437	15273	ENSMUSG00000015501	ENSMUSG00000029832	up	2.25	0.00286
Chn2	e2	exon_skipping	down	2.36	0.0035006	chr6(+):54123458-54123496	chimerin (chimaerin) 2	NM_001163640	69993	ENSMUSG00000004633	ENSMUSG00000063406	up	1.06	0.393
Mrpl33	e13	exon_skipping	down	2.36	0.0059163	chr5(+):31964504-31964587	mitochondrial ribosomal protein L33	AK038023	100503002	ENSMUSG00000029142	ENSMUSG00000024076	up	1.67	0.00362
Chn2	e3	unknown	down	2.35	0.0061351	chr6(+):54144020-54144075	chimerin (chimaerin) 2	NM_001163640	69993	ENSMUSG00000004633	ENSMUSG00000035783	down	7.08	0.012
Gramd1b	e3	unknown	down	2.35	0.0079566	chr9(-):40220882-40220959	GRAM domain containing 1B	AK028277	235283	ENSMUSG00000040111	ENSMUSG00000052632	up	1.16	8.33e-05
Dnajc19	e7	alternative_last_exon	down	2.34	0.0025831	chr3(-):33954942-33957036	DnaJ (Hsp40) homolog, subfamily C, member 19	AK076602	67713	ENSMUSG00000027679	ENSMUSG00000006585	down	1.43	0.0633
Chn2	e1	alternative_first_exon	down	2.33	0.0033565	chr6(+):53989924-53990149	chimerin (chimaerin) 2	NM_001163640	69993	ENSMUSG00000004633	ENSMUSG00000004633	up	1.63	0.017
Lsamp // D930030D11Rik	e2	exon_skipping	down	2.33	0.0368	chr16(+):40262381-40262582	limbic system-associated membrane protein // RIKEN cDNA D930030D11 gene	AK164171	268890 // null	ENSMUSG00000061080 // null	ENSMUSG00000049482	up	1.04	0.855
Cdt1	e4	unknown	down	2.32	0.00178237	chr8(+):125093804-125094001	chromatin licensing and DNA replication factor 1	AK076527	67177	ENSMUSG00000006585	ENSMUSG00000022099	up	1.81	0.0445
Ctu2	e5	unknown	down	2.32	0.0053166	chr8(+):125002085-125002145	cytosolic thiouridylase subunit 2 homolog (S. pombe)	AK090391	66965	ENSMUSG00000049482	ENSMUSG00000022177	down	1.78	0.0144
Chn2	e7	alternative_last_exon,exon_skipping	down	2.31	0.0079395	chr6(+):54171915-54172544	chimerin (chimaerin) 2	NM_001163640	69993	ENSMUSG00000004633	ENSMUSG00000025809	down	1.08	0.389
Rapgef5	e25	unknown	down	2.29	0.03222	chr12(+):118982646-118982733	Rap guanine nucleotide exchange factor (GEF) 5	NM_175930	217944	ENSMUSG00000041992	ENSMUSG00000058740	up	1.51	0.00538
Ankrd11	e3	alternative_last_exon,exon_skipping	down	2.29	0.0160032	chr8(-):125455417-125455958	ankyrin repeat domain 11	NR_037865	77087	ENSMUSG00000035569	ENSMUSG00000032036	down	1.11	0.358
Tmtc2	e12	alternative_first_exon,exon_skipping	down	2.26	0.024599	chr10(-):104671839-104672005	transmembrane and tetratricopeptide repeat containing 2	NM_177368	278279	ENSMUSG00000036019	ENSMUSG00000040263	down	1.25	0.0866
Fxyd5	ae8	intron_retention	down	2.24	0.021603	---	FXYD domain-containing ion transport regulator 5	NM_008761	18301	ENSMUSG00000009687	ENSMUSG00000040263	down	1.25	0.0866
4833420G17Rik	e6	unknown	down	2.23	0.0024609	chr13(+):120260946-120261047	RIKEN cDNA 4833420G17 gene	NM_026127	67392	ENSMUSG00000062822	ENSMUSG00000061080 // null	up	1.2	0.0162
Ppwd1	e3	unknown	down	2.22	0.0079165	chr13(-):105013172-105013272	peptidylprolyl isomerase domain and WD repeat containing 1	NM_172807	238831	ENSMUSG00000021713	ENSMUSG00000006392	up	1.46	0.0342
Nos1ap	ae9	alternative_last_exon	down	2.21	0.0063988	---	nitric oxide synthase 1 (neuronal) adaptor protein	NM_001109985	70729	ENSMUSG00000038473	ENSMUSG00000029142	up	1.5	0.0227
Cenpp	e7	alternative_last_exon,exon_skipping	down	2.21	0.025278	chr13(-):49649048-49649338	centromere protein P	BC094280	66336	ENSMUSG00000021391	ENSMUSG00000036564	down	1.59	0.14
Slc4a10	e1	alternative_first_exon	down	2.2	0.0031202	chr2(+):61884572-61884749	solute carrier family 4, sodium bicarbonate cotransporter-like, member 10	NM_033552	94229	ENSMUSG00000026904	ENSMUSG00000031902	down	1.04	0.399
Ghr	ae2	alternative_first_exon,exon_skipping	down	2.2	0.0085976	---	growth hormone receptor	NM_010284	14600	ENSMUSG00000055737	ENSMUSG00000022204	up	1.07	0.455
Fry	ae53	alternative_donor_splice_site	down	2.19	0.038617	---	furry homolog (Drosophila)	NM_172887	320365	ENSMUSG00000056602	ENSMUSG00000049493	up	1.58	0.0352
2210418O10Rik	e8	unknown	down	2.19	0.021016	chr2(-):175443037-175443219	RIKEN cDNA 2210418O10 gene	BC090643	100504263	ENSMUSG00000078894	ENSMUSG00000021713	up	1.15	0.178
Kcnt1	e3	exon_skipping	down	2.19	0.046723	chr2(+):25737716-25737757	potassium channel, subfamily T, member 1	NM_001145403	227632	ENSMUSG00000058740	ENSMUSG00000041992	down	1.1	0.932
Recql5	e18	unknown	down	2.16	0.0197838	chr11(-):115755261-115755351	RecQ protein-like 5	NM_130454	170472	ENSMUSG00000020752	ENSMUSG00000031959	up	1.22	0.0443
Zfpm1	e5	unknown	down	2.15	0.00109654	chr8(+):124855990-124856089	zinc finger protein, multitype 1	AF006492	22761	ENSMUSG00000049577	ENSMUSG00000049577	up	1.04	0.668
Slc22a17	ae8	intron_retention	down	2.15	0.0037768	---	solute carrier family 22 (organic cation transporter), member 17	AK163116	59049	ENSMUSG00000022199	ENSMUSG00000009687	up	1.88	0.164
Gpr137b-ps	ae4	intron_retention	down	2.14	0.0133222	---	G protein-coupled receptor 137B, pseudogene	NR_003568	664862	ENSMUSG00000075118	ENSMUSG00000022199	up	1.17	0.0123
Med8	e3	exon_skipping	down	2.13	0.00023981	chr4(+):118084131-118084178	mediator of RNA polymerase II transcription, subunit 8 homolog (yeast)	NM_173719	80509	ENSMUSG00000006392	ENSMUSG00000015134	up	2.15	0.0122
Chn2	e5	unknown	down	2.12	0.0157836	chr6(+):54168518-54168631	chimerin (chimaerin) 2	NM_001163640	69993	ENSMUSG00000004633	ENSMUSG00000015134	up	2.15	0.0122
Haus4	e9	unknown	down	2.11	0.010417	chr14(-):55161220-55161288	HAUS augmin-like complex, subunit 4	NM_145462	219072	ENSMUSG00000022177	ENSMUSG00000015134	up	2.15	0.0122
Taf9	e7	alternative_last_exon	down	2.11	0.0087356	chr13(+):101435782-101436368	TAF9 RNA polymerase II, TATA box binding protein (TBP)-associated factor	NM_027592	108143	ENSMUSG00000078941	ENSMUSG00000015134	up	2.15	0.0122
Naa30	ae3	alternative_first_exon	down	2.1	0.022923	---	N(alpha)-acetyltransferase 30, NatC catalytic subunit	NM_001081430	70646	ENSMUSG00000036282	ENSMUSG00000058589	down	1.31	0.101
Pls1	e14	unknown	down	2.1	0.0062969	chr9(-):95661732-95661855	plastin 1 (I-isoform)	NM_001033210	102502	ENSMUSG00000049493	ENSMUSG00000058589	down	1.31	0.101
Iqck	ae6	alternative_last_exon	down	2.09	0.0072751	---	IQ motif containing K	NM_001081446	434232	ENSMUSG00000073856	ENSMUSG00000058589	down	1.31	0.101
Vit	e7	alternative_last_exon,exon_skipping	down	2.09	0.0049198	chr17(+):78976560-78976911	vitrin	NM_028813	74199	ENSMUSG00000024076	ENSMUSG00000058589	down	1.31	0.101
Plk1 // Dctn5	e15	unknown	down	2.08	0.047502	chr7(+):129312595-129312777	polo-like kinase 1 // dynactin 5	AK141202	18817 // 59288	ENSMUSG00000030867 // ENSMUSG00000030868	ENSMUSG00000015451	up	1.43	0.074
Svep1	e18	unknown	down	2.08	0.0053645	chr4(-):58124171-58124332	sushi, von Willebrand factor type A, EGF and pentraxin domain containing 1	NM_022814	64817	ENSMUSG00000028369	ENSMUSG00000015451	up	1.43	0.074
Dnahc7b	e31	unknown	down	2.08	0.0147618	chr1(+):46261063-46261161	dynein, axonemal, heavy chain 7B	NM_001160386	227058	ENSMUSG00000041144	ENSMUSG00000015451	up	1.43	0.074
Magi1	e2	alternative_last_exon,exon_skipping	down	2.07	0.005761	chr6(-):94000255-94000760	membrane associated guanylate kinase, WW and PDZ domain containing 1	AK147358	14924	ENSMUSG00000045095	ENSMUSG00000015451	up	1.43	0.074
Chn2	e6	unknown	down	2.07	0.0067826	chr6(+):54170411-54170696	chimerin (chimaerin) 2	NM_001163640	69993	ENSMUSG00000004633	ENSMUSG00000004633	up	1.63	0.017
Cpne7	e5	unknown	down	2.07	0.0173022	chr8(+):125649462-125649545	copine VII	NM_170684	102278	ENSMUSG00000034796	ENSMUSG00000004633	up	1.63	0.017
Pgcp	e2	alternative_first_exon,exon_skipping	down	2.05	0.0167202	chr15(+):33020063-33020249	plasma glutamate carboxypeptidase	NM_176073	54381	ENSMUSG00000039007	ENSMUSG00000040690	up	1.61	0.00972
Epb4.9	ae16	exon_skipping	down	2.05	0.023343	---	erythrocyte protein band 4.9	NM_001252664	13829	ENSMUSG00000022099	ENSMUSG00000034796	down	1.98	0.0605
Pnpla8	e2	unknown	down	2.05	0.0156556	chr12(+):45331543-45331599	patatin-like phospholipase domain containing 8	AK084928	67452	ENSMUSG00000036257	ENSMUSG00000034796	down	1.98	0.0895
Cobll1	ae5	alternative_last_exon	down	2.04	0.045598	---	Cobl-like 1	NM_177025	319876	ENSMUSG00000034903	ENSMUSG00000057933	up	2.12	0.0682
Hmgcs1	ae5	alternative_last_exon	down	2.04	0.0030224	---	3-hydroxy-3-methylglutaryl-Coenzyme A synthase 1	AK031297	null	null	ENSMUSG00000028790	down	4.84	1.17e-06
Plk1 // Dctn5	e16	alternative_last_exon	down	2.03	0.034796	chr7(+):129312901-129313389	polo-like kinase 1 // dynactin 5	AK141202	18817 // 59288	ENSMUSG00000030867 // ENSMUSG00000030868	ENSMUSG00000090272	up	1.94	0.206
Rab30	ae2	alternative_first_exon	down	2.02	0.021759	---	RAB30, member RAS oncogene family	AK142206	75985	ENSMUSG00000030643	ENSMUSG00000030739	up	1.31	0.131
Tmed5	e6	alternative_last_exon,exon_skipping	down	2.02	0.00165501	chr5(-):108546680-108548427	transmembrane emp24 protein transport domain containing 5	AK078317	73130	ENSMUSG00000063406	ENSMUSG00000021684	up	1.64	0.0343
Kirrel3	e3	exon_skipping	down	2.02	0.030099	chr9(+):34302604-34302740	kin of IRRE like 3 (Drosophila)	AK079332	67703	ENSMUSG00000032036	ENSMUSG00000030867 // ENSMUSG00000030868	up	1.3	0.0208
Plk1 // Dctn5	e8	unknown	down	2.01	0.026801	chr7(+):129304050-129304218	polo-like kinase 1 // dynactin 5	AK141202	18817 // 59288	ENSMUSG00000030867 // ENSMUSG00000030868	ENSMUSG00000021713	down	1.42	0.0295
2210418O10Rik	e9	alternative_last_exon	down	2.01	5.6183e-05	chr2(-):175432868-175437497	RIKEN cDNA 2210418O10 gene	BC090643	100504263	ENSMUSG00000078894	ENSMUSG00000020752	up	1.16	0.0264
Msi2	e9	alternative_first_exon,exon_skipping	down	2	0.0081351	chr11(-):88535521-88535781	Musashi homolog 2 (Drosophila)	NM_054043	76626	ENSMUSG00000069769	ENSMUSG00000046985	down	1.08	0.439
Acta2	e7	unknown	up	3.64	0.035439	chr19(-):34319402-34319593	actin, alpha 2, smooth muscle, aorta	AK156331	11475	ENSMUSG00000035783	ENSMUSG00000030643	up	1.74	0.0165
Gsta2	e3	unknown	up	3.52	0.036039	chr9(-):78186452-78186503	glutathione S-transferase, alpha 2 (Yc2)	AK002712	14858	ENSMUSG00000057933	ENSMUSG00000031586	down	2.12	0.0579
Khdrbs1	e6	unknown	up	3.22	6.4745e-05	chr4(-):129397896-129398097	KH domain containing, RNA binding, signal transduction associated 1	NR_045036	20218	ENSMUSG00000028790	ENSMUSG00000015134	up	2.15	0.0122
Ppwd1	e11	alternative_last_exon	up	3.02	7.6295e-05	chr13(-):104995201-104995727	peptidylprolyl isomerase domain and WD repeat containing 1	NM_172807	238831	ENSMUSG00000021713	ENSMUSG00000085156	down	1.09	0.473
Ndrg4	e13	unknown	up	3	0.0139979	chr8(+):98234993-98235044	N-myc downstream regulated gene 4	NM_145602	234593	ENSMUSG00000036564	ENSMUSG00000069769	up	1.13	0.152
Shisa3	e4	unknown	up	2.75	0.0164041	chr5(+):68012500-68012576	shisa homolog 3 (Xenopus laevis)	AK085772	330096	ENSMUSG00000050010	ENSMUSG00000015134	up	2.15	0.0122
C4a	e4	unknown	up	2.74	0.00053908	chr17(-):34959055-34959125	complement component 4A (Rodgers blood group)	AK129017	625018	ENSMUSG00000015451	ENSMUSG00000034903	down	1.11	0.379
C4a	e28	unknown	up	2.67	1.50691e-05	chr17(-):34951007-34951178	complement component 4A (Rodgers blood group)	AK129017	625018	ENSMUSG00000015451	ENSMUSG00000030867 // ENSMUSG00000030868	up	1.3	0.0208
Pde8b	e18	unknown	up	2.64	0.0106761	chr13(-):95813382-95813427	phosphodiesterase 8B	NM_172263	218461	ENSMUSG00000021684	ENSMUSG00000021713	down	1.42	0.0295
Ppwd1	e10	unknown	up	2.56	0.00069503	chr13(-):104997179-104997361	peptidylprolyl isomerase domain and WD repeat containing 1	NM_172807	238831	ENSMUSG00000021713	ENSMUSG00000078941	up	1.32	0.0319
Fbrsl1	e6	alternative_first_exon,exon_skipping	up	2.49	0.0175444	chr5(-):110815920-110816146	fibrosin-like 1	NM_001142642	381668	ENSMUSG00000043323	ENSMUSG00000035569	up	1.06	0.439
C4a	e3	unknown	up	2.43	1.92342e-05	chr17(-):34959334-34959535	complement component 4A (Rodgers blood group)	AK129017	625018	ENSMUSG00000015451	ENSMUSG00000015501	up	1.18	0.452
Rbpms	e1	alternative_first_exon	up	2.43	0.021261	chr8(-):35039948-35040313	RNA binding protein gene with multiple splicing	NM_019733	19663	ENSMUSG00000031586	ENSMUSG00000068205	up	1.12	0.262
C4a	e9	unknown	up	2.22	0.0075201	chr17(-):34957467-34957599	complement component 4A (Rodgers blood group)	AK129017	625018	ENSMUSG00000015451	ENSMUSG00000036634	up	5.67	0.00212
Ppwd1	e9	unknown	up	2.22	0.00074064	chr13(-):104998077-104998158	peptidylprolyl isomerase domain and WD repeat containing 1	NM_172807	238831	ENSMUSG00000021713	ENSMUSG00000021596	up	1.11	0.412
Phyhip	e4	unknown	up	2.2	0.036344	chr14(+):70865257-70865374	phytanoyl-CoA hydroxylase interacting protein	AK049900	105653	ENSMUSG00000003469	ENSMUSG00000003469	up	1.86	0.000419
Ppwd1	e8	unknown	up	2.19	0.00020467	chr13(-):104999694-104999875	peptidylprolyl isomerase domain and WD repeat containing 1	NM_172807	238831	ENSMUSG00000021713	ENSMUSG00000033931	up	1.19	0.031
Mctp1	e22	unknown	up	2.19	0.0085172	chr13(+):77167883-77167980	multiple C2 domains, transmembrane 1	AK047562	78771	ENSMUSG00000021596	ENSMUSG00000055319	up	1.23	0.0068
Nfatc3	e11	exon_skipping	up	2.17	0.040455	chr8(+):108643222-108643325	nuclear factor of activated T cells, cytoplasmic, calcineurin dependent 3	NM_010901	18021	ENSMUSG00000031902	ENSMUSG00000050010	down	2.22	0.0977
C4a	e2	unknown	up	2.17	2.2494e-05	chr17(-):34959993-34960185	complement component 4A (Rodgers blood group)	AK129017	625018	ENSMUSG00000015451	ENSMUSG00000028797	up	1.25	0.0139
Rbm34	e5	exon_skipping	up	2.15	0.0156577	chr8(-):129485812-129485871	RNA binding motif protein 34	NM_172762	52202	ENSMUSG00000033931	ENSMUSG00000075118	up	1.75	0.0441
Chn2	ae10	alternative_first_exon	up	2.13	0.00063853	---	chimerin (chimaerin) 2	NM_001163640	69993	ENSMUSG00000004633	ENSMUSG00000062822	down	1.83	0.000639
Mndal	e9	unknown	up	2.1	0.00162212	chr1(-):175792592-175793014	myeloid nuclear differentiation antigen like	NM_001170853	100040462	ENSMUSG00000090272	ENSMUSG00000015134	up	2.15	0.0122
Anks1b	e5	unknown	up	2.08	0.021459	chr10(+):89532213-89532288	ankyrin repeat and sterile alpha motif domain containing 1B	NM_001128086	77531	ENSMUSG00000058589	ENSMUSG00000015451	up	1.43	0.074
Anks1b	e11	unknown	up	2.05	0.025518	chr10(+):89770314-89770450	ankyrin repeat and sterile alpha motif domain containing 1B	NM_001128086	77531	ENSMUSG00000058589	ENSMUSG00000039419	up	4.22	0.00046
Anks1b	e12	unknown	up	2.04	0.0060772	chr10(+):89821780-89821960	ankyrin repeat and sterile alpha motif domain containing 1B	NM_001128086	77531	ENSMUSG00000058589	ENSMUSG00000041144	up	1.22	0.124
Col16a1	e28	unknown	up	2.04	1.79276e-05	chr4(+):129742108-129742143	collagen, type XVI, alpha 1	NM_028266	107581	ENSMUSG00000040690	ENSMUSG00000032815	down	1.88	0.014
Setx	ae4	alternative_last_exon	up	2.04	0.040023	---	senataxin	NM_198033	269254	ENSMUSG00000043535	ENSMUSG00000028790	down	4.84	1.17e-06
Myh14	e12	unknown	up	2.01	0.041544	chr7(-):51896431-51896549	myosin, heavy polypeptide 14	AY363100	71960	ENSMUSG00000030739	ENSMUSG00000036257	up	1.34	0.0434
Anks1b	e10	unknown	up	2.01	0.0135365	chr10(+):89723398-89723563	ankyrin repeat and sterile alpha motif domain containing 1B	NM_001128086	77531	ENSMUSG00000058589	ENSMUSG00000021713	down	1.42	0.0295
Wdr59	e27	unknown	up	2.01	0.0101202	chr8(-):113982511-113982653	WD repeat domain 59	NM_176923	319481	ENSMUSG00000031959	ENSMUSG00000028369	down	1.91	0.0129
