# Supplementary figures and images for: Sam68 promotes self-renewal and glycolytic metabolism in mouse neural progenitor cells by modulating Aldh1a3 pre-mRNA 3'-end processing
Source: eLife journal article supplement (doi:10.7554/elife.20750), 2016-11-15

A

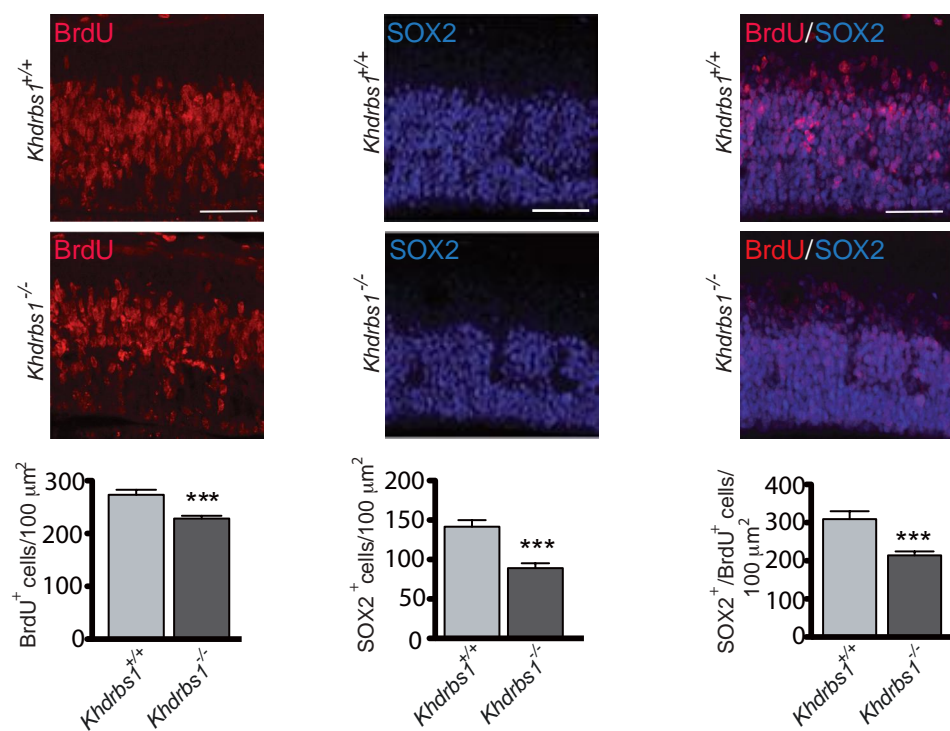

B

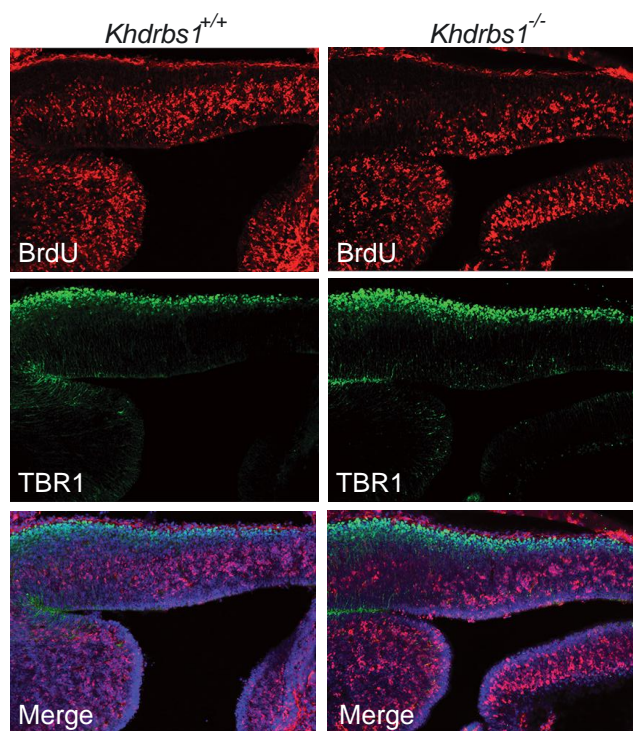

Supplement: supp [file elife_poa_e20750_Figure_2_Supplement_1.pdf › elife_poa_e20750_Figure_2_Supplement_1.pdf]

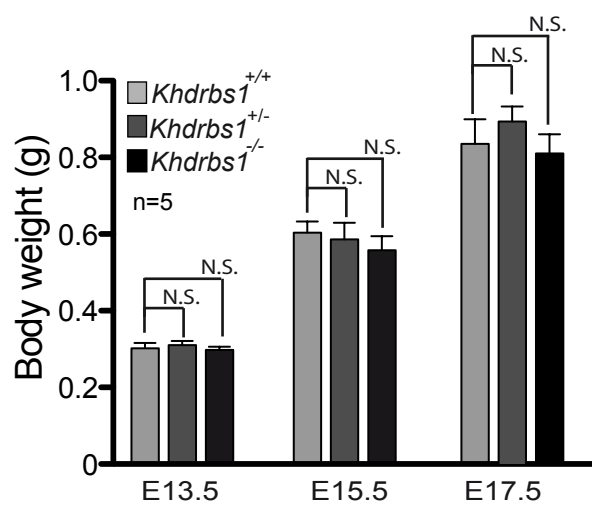

La Rosa\_Figure3-supplement 1

Supplement: supp [file elife_poa_e20750_Figure_3_Supplement_1.pdf › elife_poa_e20750_Figure_3_Supplement_1.pdf]

A

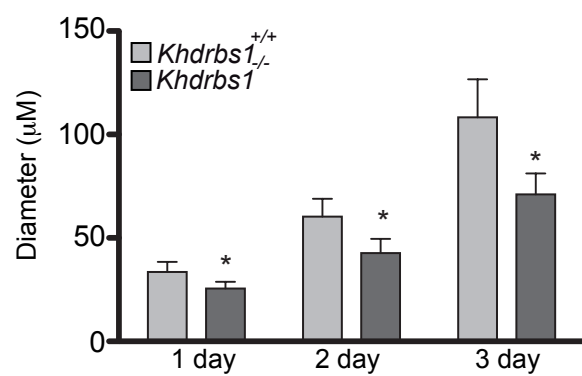

B

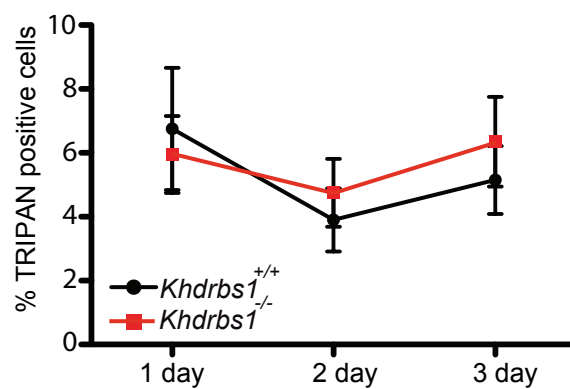

C

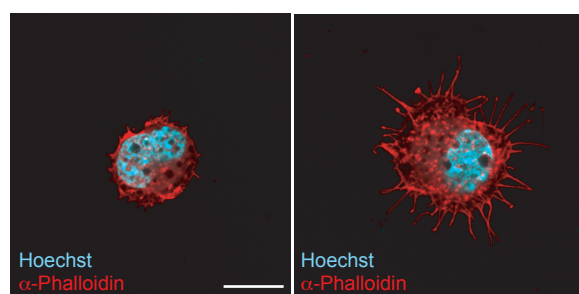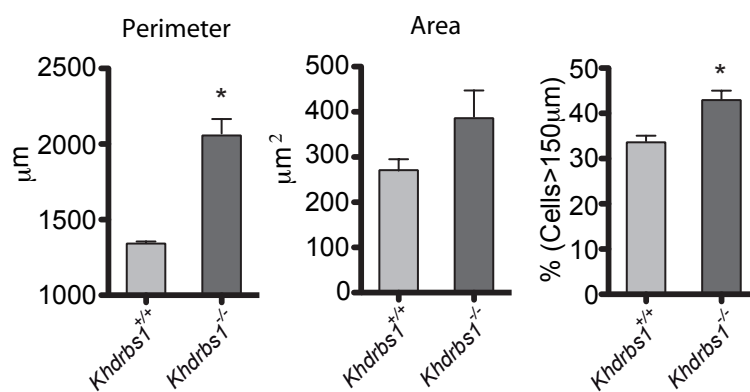

Supplement: supp [file elife_poa_e20750_Figure_4_Supplement_1.pdf › elife_poa_e20750_Figure_4_Supplement_1.pdf]

A

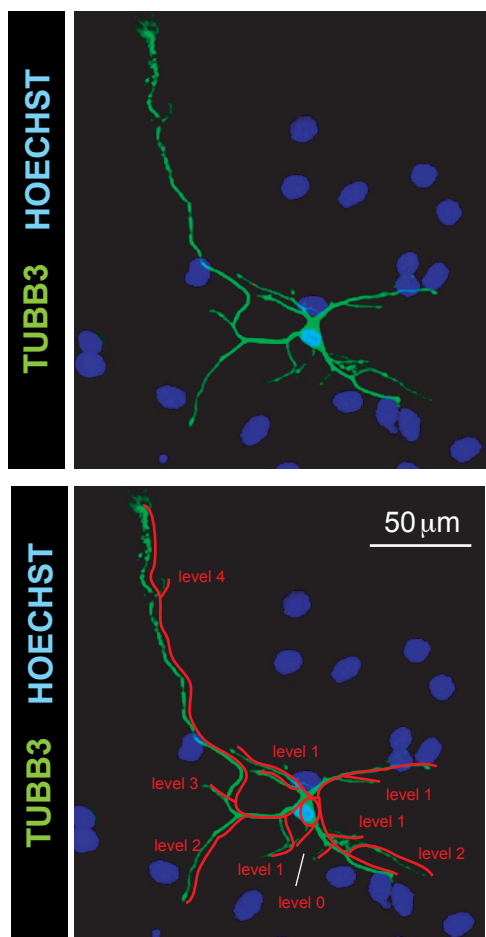

B

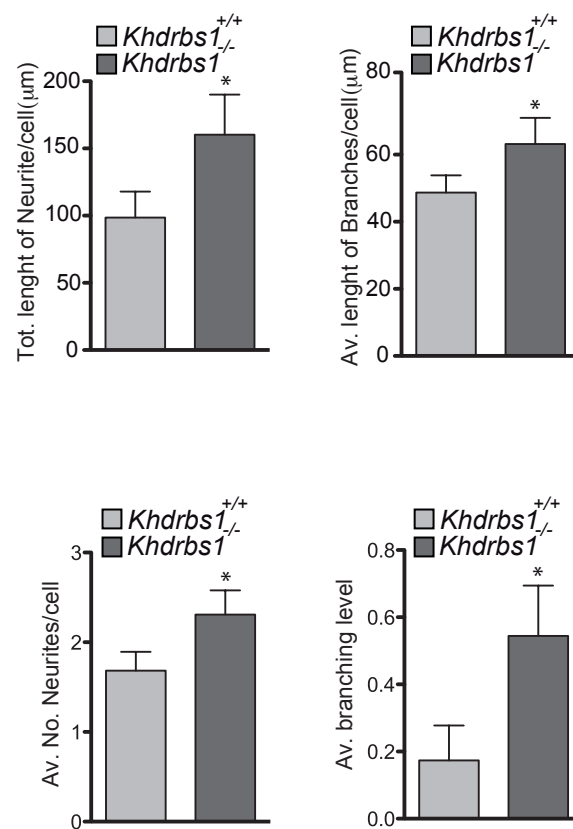

Supplement: supp [file elife_poa_e20750_Figure_4_Supplement_2.pdf › elife_poa_e20750_Figure_4_Supplement_2.pdf]

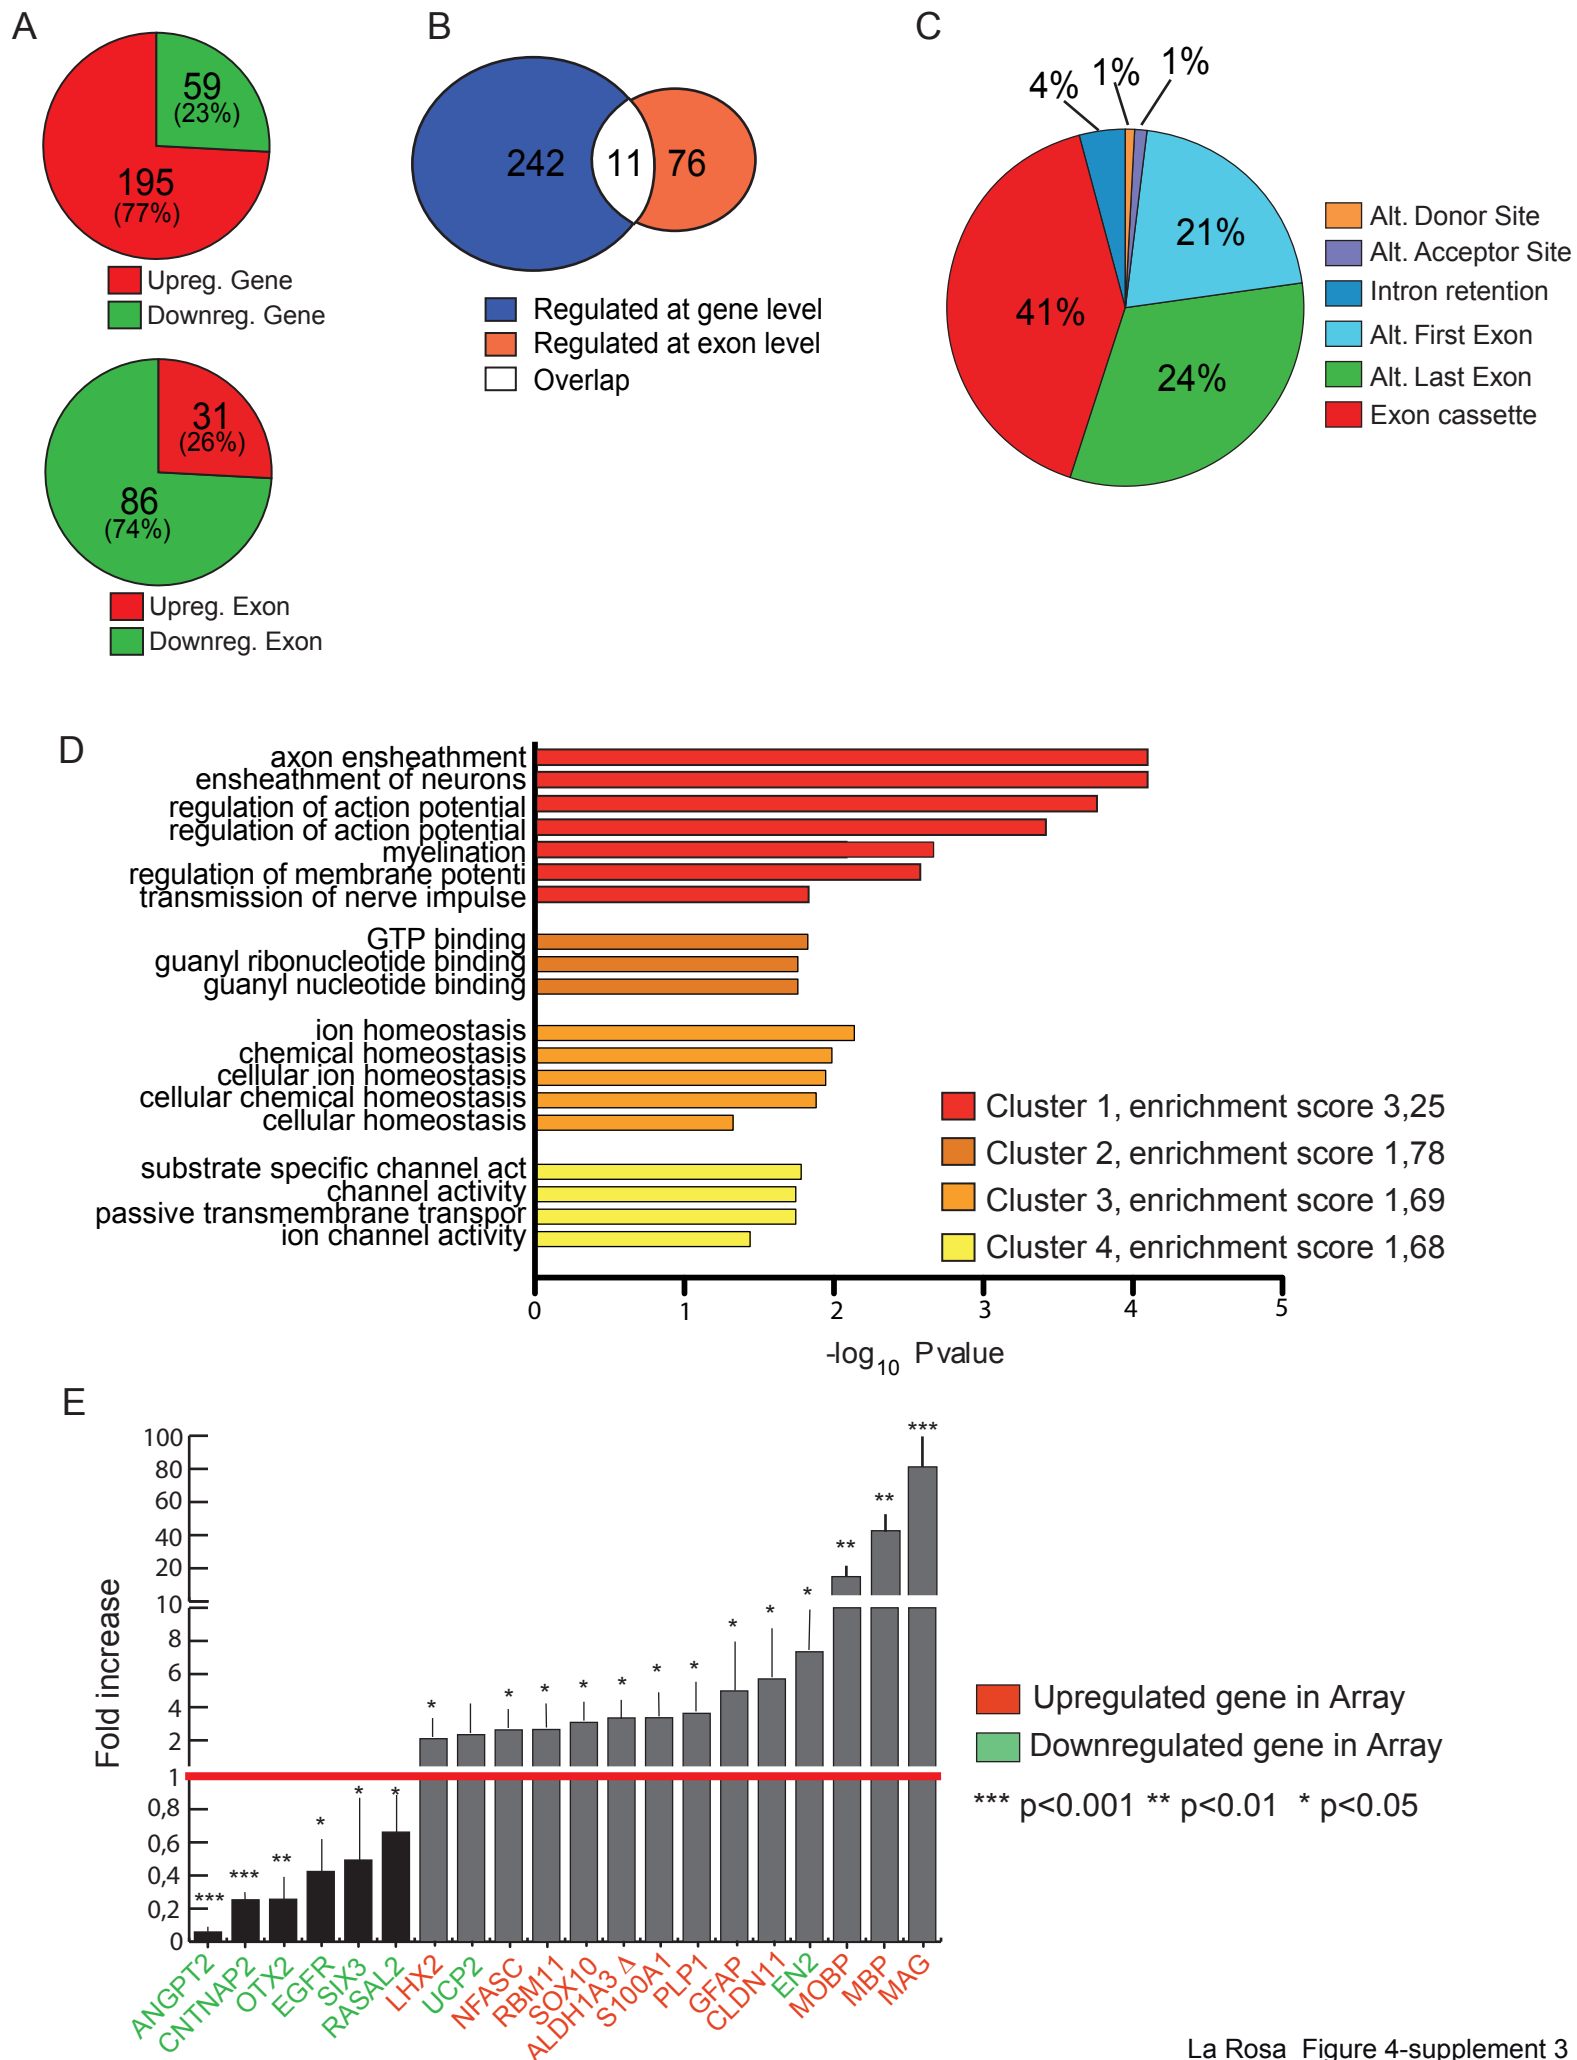

Supplement: supp [file elife_poa_e20750_Figure_4_Supplement_3.pdf › elife_poa_e20750_Figure_4_Supplement_3.pdf]

A

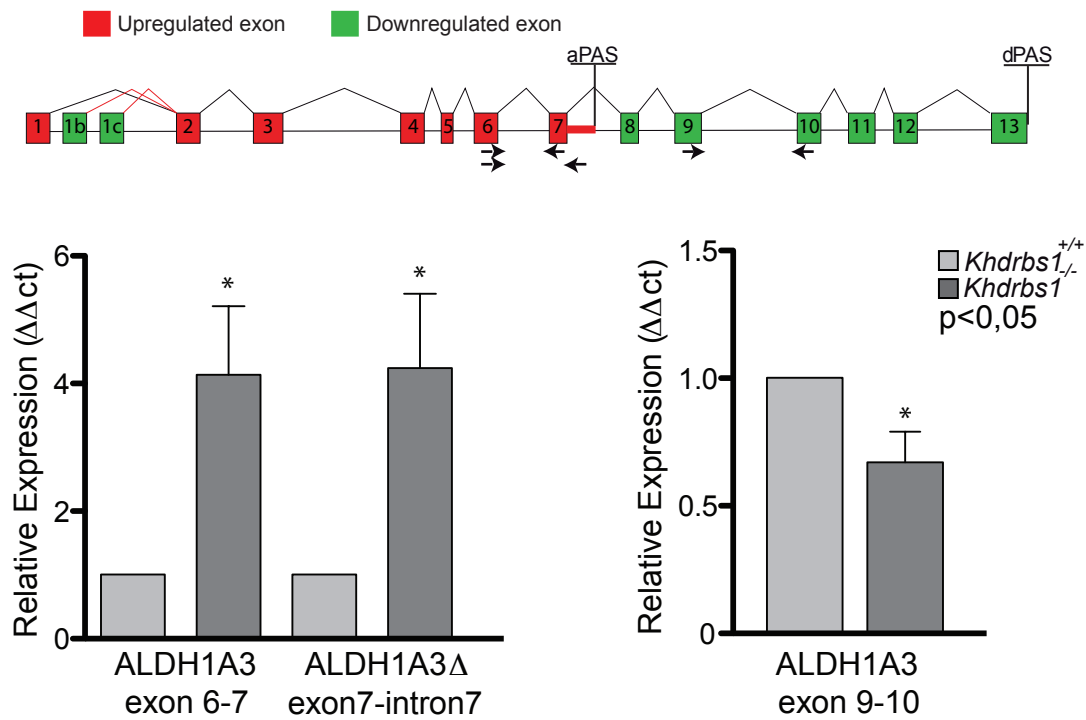

B

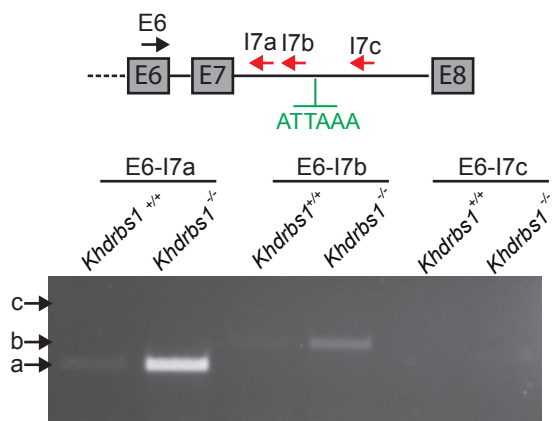

C

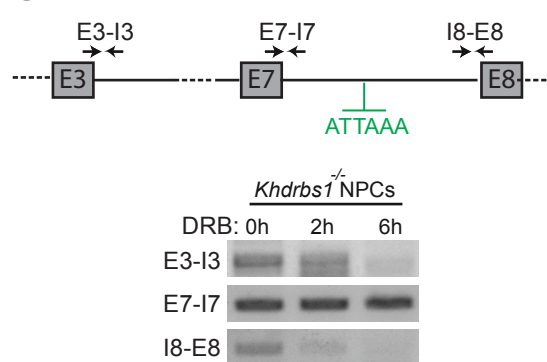

Supplement: supp [file elife_poa_e20750_Figure_5_Supplement_1.pdf › elife_poa_e20750_Figure_5_Supplement_1.pdf]

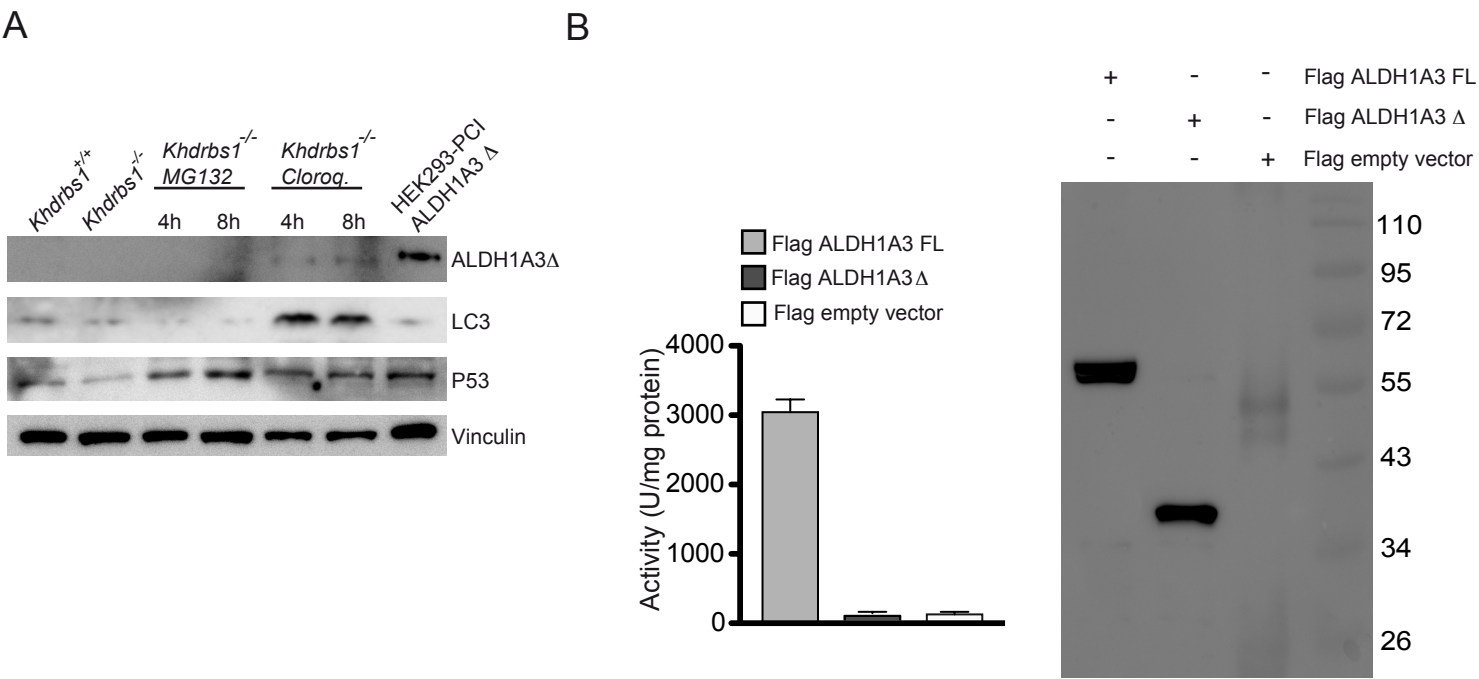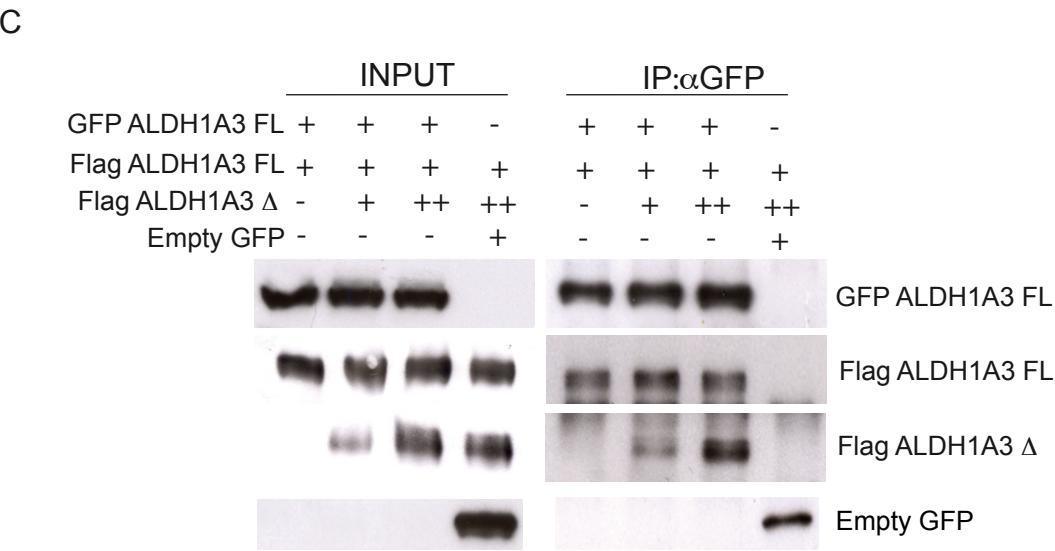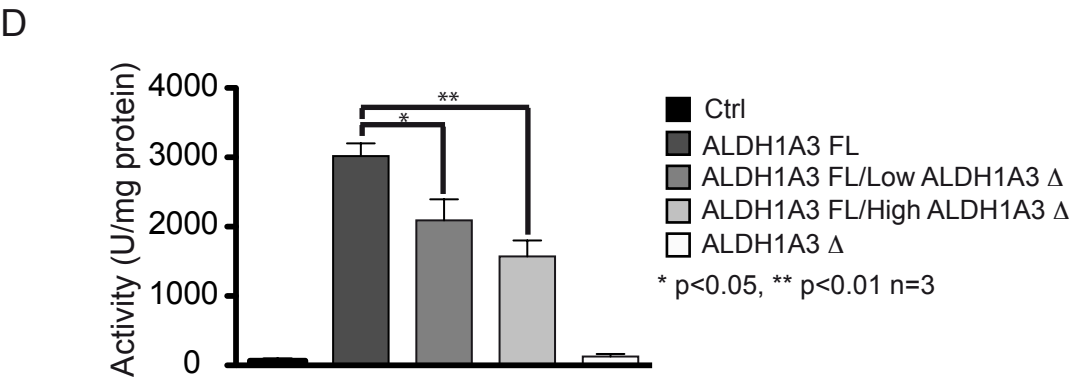

Supplement: supp [file elife_poa_e20750_Figure_6_Supplement_1.pdf › elife_poa_e20750_Figure_6_Supplement_1.pdf]

A

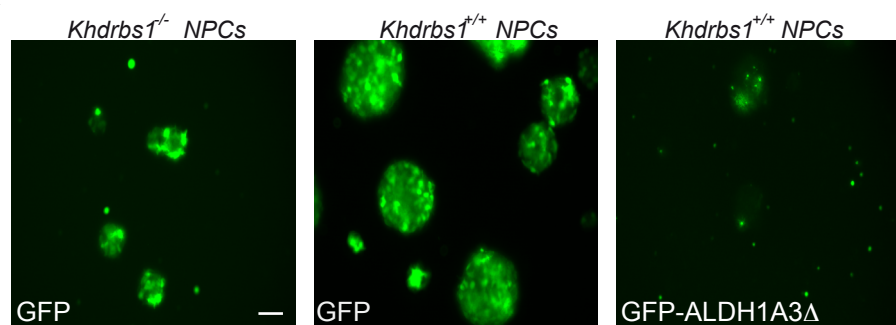

B

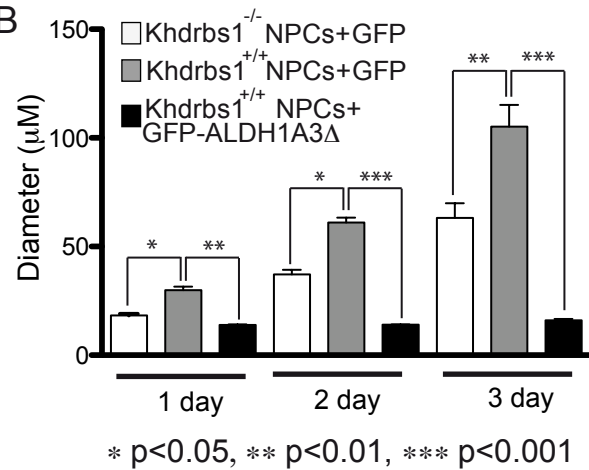

Supplement: supp [file elife_poa_e20750_Figure_7_Supplement_1.pdf › elife_poa_e20750_Figure_7_Supplement_1.pdf]

A

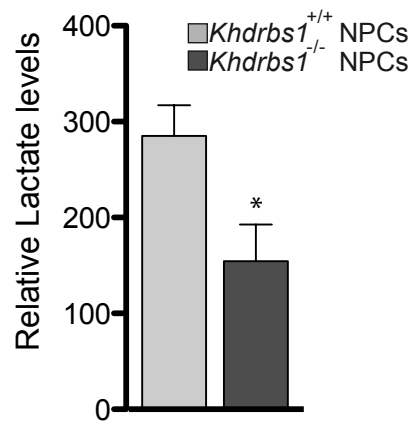

B

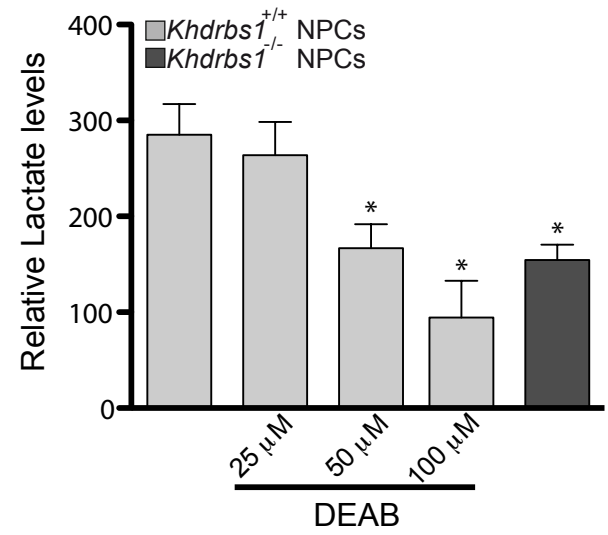

C

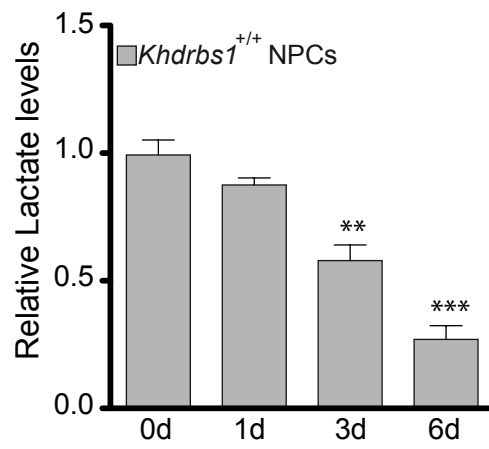

Supplement: supp [file elife_poa_e20750_Figure_7_Supplement_2.pdf › elife_poa_e20750_Figure_7_Supplement_2.pdf]
